# Supplementary material for: Checklist of Serengeti Ecosystem Grasses
Source: PubMed Central journal article supplement (PMC4867701; doi:10.3897/bdj.4.e8286), 2016-04-15
Supplement: biodiversity_data_journal-4-e8286-s001.pdf [file biodiversity_data_journal-4-e8286-s001.pdf]

## CHECKLIST OF SERENGETI ECOSYSTEM GRASSES

### BIODIVERSITY DATA JOURNAL – SUPPLEMENTARY FILE

#### AGROSTIS L.

***Agrostis kilimandscharica* Mez , Repert. Spec. Nov. Regni Veg. 18: 2 (1922)**

**Distribution:** Eastern & Central Africa

**Specimens:** Arusha Mokilal Chuwa, S 2757 (K); Empakai Crater Frame, GW 165 (K);

***Agrostis producta* Pilg. , Bot. Jahrb. Syst. 39: 600 (1907)**

**Distribution:** Tropical Africa

**Specimens:** Arusha Empakai Crater Frame, GW P 3 (EA,K); Olmoti crater Vesey-FitzGerald, LDEF 14 (?);

#### ALLOTEROPSIS J.Presl.

***Alloteropsis cimicina* (L.) Stapf , Fl. Trop. Afr. 9: 487 (1919)**

**Distribution:** Tropical Africa & Asia

**Specimens:** Mara Seronera-Klein's camp Greenway, PJ 10197 (K);

#### ANDROPOGON L.

***Andropogon amethystinus* Steud. , Syn. Pl. Glumac. 1: 371 (1854)**

(Synonym: *Andropogon pratensis* Hochst. ex Hack.)

**Distribution:** Tropical Africa, Yemen, India & Myanmar

**Specimens:** Arusha Empakai Crater Frame, GW P 2 (EA,K,NHT); Empakai Crater Frame, GW P 7 (EA,K); Empakai Crater Frame, GW 96 (EA,K,NHT); Ngorongoro Crater Pole Evans, IB 976 (K); Empakai Crater Terry, PJ 1959 (EA,NHT);

***Andropogon chrysostachyus* Steud. , Syn. Pl. Glumac. 1: 377 (1854)**

**Distribution:** Tanzania, Kenya & Ethiopia

**Specimens:** Arusha Ngorongoro Crater Chuwa, S 2746 (K);

***Andropogon distachyos* L. , Sp. Pl. 2: 1046 (1753)**

**Distribution:** Europe, Arabia & Africa

**Specimens:** Arusha Ngorongoro Crater Greenway, PJ 11842 (K); Ngorongoro Crater Newbould, JB 5977 (K);

***Andropogon greenwayi* Napper , Kirkia 3: 121 (1963)**

**Distribution:** Tanzania, Kenya, Ethiopia, Somalia & Yemen

**Specimens:** Arusha Kakesio Chuwa, S 2784 (K); Olbalbal Newbould, JB 6108 (EA); Ngorongoro Crater Paulo, S 312 (EA,K); Ngorongoro Crater Peterson, PM 24307 (US); Ngorongoro Robson, TO 173 (EA,K); Mara Seronera Greenway, PJ 10330 (EA,K); Serengeti National Park Kreulen, AR 326 (EA); Serengeti Paulo, S 371 (EA,K); Lake Lagarja Robson, TO 207 (EA,K); Serengeti National Park Vesey-FitzGerald, LDEF 4692 (EA); Shinyanga Naabi Hill Gate Belsky, JB 259 (EA); Naabi Hill Greenway, PJ 10148 (EA,K); Naabi Hill Greenway, PJ 10165 (EA,K,PRE);

***Andropogon lima* (Hack.) Stapf , Fl. Trop. Afr. 9: 217 (1918)**

**Distribution:** Tropical Africa

**Specimens:** Arusha Lemagarut Mt. Chuwa, S 2674 (K); Oldeani Mt Chuwa, S 89004 T (K);

***Andropogon schirensis* Hochst. , Tent. Fl. Abyss. 2: 456 (1850)**

**Distribution:** Tropical & Southern Africa

**Specimens:** Mara Mara River Guard Post Greenway, PJ 10768 (K); Wogakuria Hill Greenway, PJ 12006 (K);

#### APOCHITON C.E.Hubb.

***Apochiton burttii* C.E.Hubb , Hooker's Icon. Pl. 34: t. 3319 (1936)**

**Distribution:** Tanzania endemic

**Specimens:** Arusha Ologumi Ellemann, L 657 (AAU); Olduvai Vesey-FitzGerald, LDEF 4487 (SWRC); Olduvai Vesey-FitzGerald, LDEF 7266 (SWRC);

## **ARISTIDA L.**

### ***Aristida adoensis* Hochst. , Tent. Fl. Abyss. 2: 390 (1850)**

**Distribution:** Eastern Africa

**Specimens:** Arusha Olbalbal Kirika, P 5925 (EA); Endulen Kirika, P 6449 (EA); Olbalbal Newbould, JB 5925 (EA); Endulen Newbould, JB 6449 (EA); Ngorongoro Vesey-FitzGerald, LDEF 12 (SWRC); Mara Lobo Lodge Belsky, PJ 285 (SWRC); Seronera Greenway, PJ 9902 (EA,K,SWRC); Seronera Greenway, PJ 10183 (EA,K,SWRC); Serengeti Herlocker, D 601 A (SWRC); Serengeti National Park Kirika, P 363 (EA); Serengeti National Park Kirika, P 5599 (EA); Banagi Leippert, H 5599 (EA,K); Seronera Ludanga, RI R 56 (EA); Seronera Schmidt, W 109 (SWRC); Shinyanga Lake Magadi Greenway, PJ 10050 (EA,SWRC); Granite Kopje Kirika, P 6561 (EA); Granite Kopje Newbould, JB 6561 (EA); Lake Magadi Paulo, S 368 (K);

### ***Aristida adscensionis* L. , Sp. Pl. 1: 82 (1753)**

**Distribution:** Widespread

**Specimens:** Arusha Olduvai Chuwa, S 2613 (K); Ngorongoro Crater Chuwa, S 2798 (K); Olbalbal Kirika, P 6026 (EA); Mara Serengeti Research Centre Mboya, E s.n. (MO);

### ***Aristida barbicollis* Trin. & Rupr. , Sp. Gram. Stipac.: 152 (1842)**

**Distribution:** Eastern & Southern Africa

**Specimens:** Mara Seronera Greenway, PJ 10303 (EA,K,SWRC); Serengeti Greenway, PJ 13324 (SWRC);

### ***Aristida hordeacea* Kunth , Révis. Gramin. 2: t. 173 (1831)**

**Distribution:** Tropical & Southern Africa

**Specimens:** Mara Seronera Greenway, PJ 10089 (EA,K,SWRC); Serengeti Paulo, S 443 (EA,K); Serengeti National Park Suleiman, HO 1077 (SWRC);

### ***Aristida kenyensis* Henrard , Meded. Rijks-Herb. 54C: 722 (1933)**

**Distribution:** Eastern Africa

**Specimens:** Arusha Olduvai Belsky, PJ 120 (SWRC); Lemuta hill Newbould, JB 163 (EA); Olbalbal Newbould, JB 5925 (EA); Olbalbal Newbould, JB 6026 (EA); Lemuta hill Oteke, J 193 (EA,K); Olbalbal Paulo, S 326 (EA,K); Lake Magadi Peterson, PM 24316 (US); Mara Ndutu Lodge Belsky, PJ 68 (SWRC); Seronera Greenway, PJ 9091 (EA,SWRC); Seronera Greenway, PJ 9901 (EA,K); Seronera Greenway, PJ 9973 (EA,K,SWRC); Seronera Greenway, PJ 10188 (EA,K,SWRC); Musoma Greenway, PJ 10327 (EA,SWRC); Serengeti Plains Greenway, PJ 11181 (EA); Seronera Paulo, S 354 (EA,K); Lobo Lodge Peterson, PM 24297 (US); Simba Kopjes Schmidt, W 186 (SWRC); Shinyanga Lake Magadi Greenway, PJ 10051 (EA,K,SWRC);

### ***Aristida mutabilis* Trin. & Rupr. , Sp. Gram. Stipac. 150 (1842)**

**Distribution:** Tropical Africa & Asia

**Specimens:** Arusha Ol Doinyo Lengai Greenway, PJ 11349 (EA,K);

### ***Aristida* sp.**

**Specimens:** Mara Serengeti National Park, near Mbuzi Mare camp Peterson, PM 24279 (US);

## **BOTHRIOCHLOA Kuntze**

### ***Bothriochloa bladhii* (Retz.) S.T.Blake , Proc. Roy. Soc. Queensland 80: 62 (1969)**

(Synonym: *Bothriochloa bladhii* (Retz.) S.T.Blake var. *bladhii* )

**Distribution:** Widespread

**Specimens:** Mara Grumeti River Greenway, PJ 13167 (K,SWRC);

### ***Bothriochloa insculpta* (Hochst. ex A.Rich.) A.Camus , Ann. Soc. Linn. Lyon, n.s., 76: 165 (1931)**

**Distribution:** Tropical Africa, Southern Africa, Arabia & Asia

**Specimens:** Arusha Endulen Ellemann, L 373 (AAU); Endulen Ellemann, L 375 (AAU); Mara Serengeti Research Institute Belsky, PJ 173 (SWRC); Serengeti Research Institute Belsky, PJ 194 (SWRC); Seronera Paulo, S 355 (K); Banagi Hill Paulo, S 365 (K); Shinyanga Lake Magadi Greenway, PJ 10048 (K,SWRC); Naabi Hill Gate Peterson, PM 24274 (US);

***Bothriochloa pertusa* (L.) A.Camus , Ann. Soc. Linn. Lyon, n.s., 76: 164 (1931)**

**Distribution:** Asia & Pacific, not previously recorded for East Africa

**Specimens:** Mara Seronera *Schmidt, W 102* (SWRC); Simba Kopjes *Schmidt, W 273* (SWRC); Bolgonja *Schmidt, W 439* (SWRC);

***Bothriochloa radicans* (Lehm.) A.Camus , Ann. Soc. Linn. Lyon, n.s., 76: 164 (1931)**

**Distribution:** Eastern & Southern Africa, Arabia,

**Specimens:** Mara Serengeti Research Institute *Belsky, PJ 2* (EA,SWRC); Seronera *Greenway, PJ 9838* (EA,K,SWRC); Ndabaka *Greenway, PJ 10378* (EA,K,SWRC); Seronera plain *Mbano, BNN CAWM 5549* (EA); Simba Kopjes *Schmidt, W 39* (SWRC);

**BRACHIARIA (Trin.) Griseb.**

***Brachiaria ambigens* Chiov. , Webbia 8: 62 (1951)**

**Distribution:** Tanzania, Kenya & Ethiopia

**Specimens:** Arusha Olbalbal *Newbould, JB 6361* (EA,K);

***Brachiaria arrecta* (T.Durand & Schinz) Stent , Bothalia 1: 263 (1924)**

**Distribution:** Eastern & Southern Africa

**Specimens:** Mara Serengeti National Park *Mbano, BNN CAWM 5525* (K); Shinyanga Naabi Hill Gate *Peterson, PM 24275* (US);

***Brachiaria bovonei* (Chiov.) Robyns , Bull. Jard. Bot. État Bruxelles 9: 174 (1932)**

**Distribution:** Eastern & Southern Africa

**Specimens:** Mara Tabora Air Strip *Greenway, PJ 10915* (K);

***Brachiaria brizantha* (A.Rich.) Stapf , Fl. Trop. Afr. 9: 531 (1919)**

**Distribution:** Tropical & Southern Africa, introduced elsewhere in the tropics

**Specimens:** Mara Bolgonja river *Greenway, PJ 10749* (K,SWRC); Bolgonja *Schmidt, W 690* (SWRC);

***Brachiaria dictyoneura* (Fig. & De Not.) Stapf , Fl. Trop. Afr. 9: 512 (1919)**

(Synonym: *Urochloa dictyoneura* (Fig. & De Not.) Veldkamp )

**Distribution:** Eastern & Southern Africa, introduced elsewhere

**Specimens:** Mara Lobo Lodge *Belsky, PJ 281* (SWRC); Seronera *Greenway, PJ 10115* (K,SWRC); Serengeti National Park *Greenway, PJ 10669* (SWRC); Mara River Guard Post *Greenway, PJ 10771* (K,SWRC); Mbuli Mare camp *Peterson, PM 24284* (US); Bolgonja *Schmidt, W 328* (SWRC);

***Brachiaria eruciformis* (Sm.) Griseb. , Fl. Ross. 4: 469 (1853)**

**Distribution:** Widespread in Europe, Arabia, Africa & Asia

**Specimens:** Arusha Esere *Chuwa, S 2587* (K); Mara Seronera *Greenway, PJ 9858* (SWRC); Seronera *Greenway, PJ 10334* (K,SWRC); Serengeti Plains *Schmidt, W 212* (SWRC);

***Brachiaria leersioides* (Hochst.) Stapf , Fl. Trop. Afr. 9: 551 (1919)**

**Distribution:** Eastern Africa & Arabia

**Specimens:** Arusha Engaruka *Vesey-FitzGerald, LDEF 6577* (SWRC); Mara Serengeti Research Institute *Belsky, PJ 146* (SWRC);

***Brachiaria rugulosa* Stapf , Fl. Trop. Afr. 9: 529 (1919)**

**Distribution:** Tanzania, Kenya, Zambia & Zimbabwe

**Specimens:** Mara Simiyu *Kreulen, AR 325* (SWRC); Shinyanga Naabi Hill *Greenway, PJ 10645* (SWRC);

***Brachiaria scalaris* (Mez.) Pilg. , Notizbl. Bot. Gart. Berlin-Dahlem 10: 269 (1928)**

**Distribution:** Tropical Africa & Arabia

**Specimens:** Arusha Ngorongoro Crater *Newbould, JB 5952* (EA);

***Brachiaria semiundulata* (Hochst. ex A.Rich.) Stapf , Fl. Trop. Afr. 9: 556 (1919)**

**Distribution:** Eastern Africa & Asia

**Specimens:** Arusha Mokilal *Chuwa, S 2753* (K); Ngorongoro *Newbould, JB 5856* (EA); Mara Downeys Dam

*Braun, HMH 249* (SWRC); Robanda village *Mollel, NP 855* (NHT); Robanda village *Mollel, NP 885* (NHT); Simba Kopjes *Schmidt, W 15* (SWRC); Seronera *Schmidt, W 87* (SWRC); **Shinyanga** Moru Kopjes *Greenway, PJ 13179* (K,SWRC); Naabi Hill Gate *Vesey-FitzGerald, LDEF 6591* (SWRC);

***Brachiaria serrifolia* (Hochst.) Stapf , Fl. Trop. Afr. 9: 548 (1919)**

**Distribution:** Tropical Africa

**Specimens:** Arusha Olongogo *Newbould, JB 6380* (EA,K);

***Brachiaria sp.***

**Specimens:** Arusha Olbalbal swamp *Ellemann, L. 1100* (AAU); Olbalbal swamp *Ellemann, L. 1101* (AAU);

***Brachiaria subulifolia* (Mez) Clayton , Kew Bull. 34: 559 (1980)**

**Distribution:** Eastern & Southern Africa

**Specimens:** Mara Bolgonja *Schmidt, W 578* (SWRC);

***Brachiaria xantholeuca* (Hack.) Stapf , Fl. Trop. Afr. 9: 541 (1919)**

**Distribution:** Tropical Africa & Arabia

**Specimens:** Mara Serengeti Research Institute *Belsky, PJ 186* (SWRC); Seronera *Braun, HMH 250* (SWRC,WAG);

**BRACHYPODIUM P.Beauv.**

***Brachypodium flexum* Nees , Fl. Afr. Austral. III. 456 (1841)**

**Distribution:** Tropical Africa

**Specimens:** Arusha Empakai Crater *Frame, GW 504* (SWRC);

**BROMUS L.**

***Bromus leptoclados* Nees , Fl. Afr. Austral. III.: 453 (1841)**

**Distribution:** Eastern & Southern Africa

**Specimens:** Arusha Olmoti crater *Burt, BD 4362* (K); Oloronyo forest *Ellemann, L 768* (AAU); Empakai Crater *Frame, GW P 58* (K); Ngorongoro Crater *Greenway, PJ 3363* (K); Empakai Crater *Greenway, PJ 9131* (K); Ngorongoro *Staples, RR 283* (K);

**CALAMAGROSTIS Adans.**

***Calamagrostis epigejos* (L.) Roth , Tent. Fl. Germ. 1: 34 (1788)**

**Distribution:** Widespread

**Specimens:** Arusha Empakai Crater *Frame, GW 167* (EA,SWRC);

**CENCHRUS L.**

***Cenchrus abyssinicus* (Hack.) Morrone , Ann. Bot. (Oxford) 106: 127 (2010)**

(Synonym: *Odontelytrum abyssinicum* Hack. )

**Distribution:** Eastern Africa & Arabia

**Specimens:** Arusha Ngorongoro Crater *Goddard, J 118* (?); Ngorongoro Crater *Greenway, PJ 12617* (K);

***Cenchrus ciliaris* L. , Mant. Pl. 2: 302 (1771)**

**Distribution:** Widespread

**Specimens:** Arusha Ntudu Lodge *Belsky, PJ 69* (SWRC); Olduvai *Belsky, PJ 116* (SWRC); Olduvai Gorge *Goddard, J 253* (EA); Olduvai *Leakey, MD 19306* (K); Loliondo *Macha 1111* (NHT); Olbalbal *Newbould, JB 5725* (EA); Olbalbal *Newbould, JB 5931* (EA); Gol Kopjes *Schmidt, W 250* (SWRC); Empakai Mt *Thompson, IH 344* (K); Mara Serengeti Research Institute *Belsky, PJ 1* (SWRC); Serengeti Research Institute *Belsky, PJ 165* (SWRC); Serengeti Research Institute *Bonnefille, R 73/46* (EA); Banagi *Brown, ES 2143 B* (EA); Seronera *Greenway, PJ 9856* (EA,K,SWRC); Seronera *Greenway, PJ 9955* (EA,K,SWRC); Simba Kopjes *Harris, BJ 5454* (SWRC); Seronera camp *Jacob, J 12* (EA); Serengeti National Park *Mboya, E s.n.* (MO); Robanda village *Mollel, NP 883* (NHT); Serengeti *Paulo, S 336* (EA,K); Serengeti *Paulo, S 398* (EA); Mbuluzi Mare camp *Peterson, PM 24281* (US); Bolgonja *Schmidt, W 416* (SWRC); Lake Lagarja *Vesey-FitzGerald, LDEF 4464* (EA,SWRC);

**CHLORIS Sw.**

***Chloris gayana* Kunth , Révis. Gramin. 1: 89 (1829)**

**Distribution:** Widespread, native to Tropical Africa

**Specimens: Arusha** Endulen *Ellemann*, L 372 (AAU); Endulen *Ellemann*, L 376 (AAU); Endulen *Ellemann*, L 703 (AAU); Endulen *Ellemann*, L 714 (AAU); Oloronyo forest *Ellemann*, L 766 (AAU); Nasiporiong *Ellemann*, L 819 (AAU); Masek *Ellemann*, L 923 (AAU); Irmisigiyo *Ellemann*, L 942 (AAU); Empakai Crater *Frame*, GW 531 (SWRC); Ngorongoro Crater *Macha* 1048 (NHT); Laetoli valley *Mollel*, NP 1186 (NCAA,NHT); Ngorongoro *Newbould*, JB 5650 (K); Ngorongoro Crater *Paulo*, S 317 (K); Olduvai *Paulo*, S 681 (K); Ngorongoro *Vesey-FitzGerald*, LDEF 130 (SWRC); **Mara** Serengeti Research Institute *Belsky*, PJ 164 (SWRC); Ikoma *Brooks*, GP 34 (K); Seronera river *Greenway*, PJ 9969 (K); Seronera Lodge *Mboya*, E s.n. (MO); Serengeti Central Plains *Mboya*, E s.n. (MO); Serengeti NP *Mollel*, NP 935 (NHT); Engare Nanyuki *Newbould*, JB 6302 (K); Bolgonja *Schmidt*, W 575 (SWRC); Bolgonja *Schmidt*, W 656 (SWRC); Lake Lagarja *Vesey-FitzGerald*, LDEF 4462 (SWRC);

***Chloris pycnothrix* Trin. , Gram. Unifl. Sesquifl.: 234 (1824)**

**Distribution:** Widespread

**Specimens: Arusha** Endulen *Ellemann*, L 366 (AAU); Endulen *Ellemann*, L 706 (AAU); Nasiporiong *Ellemann*, L 814 (AAU); Olbalbal *Ellemann*, L 882 (AAU); Ngorongoro Crater *Paulo*, S 303 (K); Olbalbal *Paulo*, S 329 (K); **Mara** Ndutu Lodge *Belsky*, PJ 50 (SWRC); Serengeti Research Institute *Belsky*, PJ 192 (SWRC); Seronera *Greenway*, PJ 9874 (K,SWRC); Serengeti *Paulo*, S 440 (K);

***Chloris* sp.**

**Specimens: Arusha** Ngorongoro Crater *Peterson*, P.M. 24305 (US); **Mara** Mbuzi Mare camp *Peterson*, P.M. 24286 (US); Lobo Lodge *Peterson*, P.M. 24296 (US); Shinyanga Naabi Hill Gate *Peterson*, P.M. 24262 (US);

***Chloris virgata* Sw. , Fl. Ind. Occid. 1: 203 (1797)**

**Distribution:** Widespread

**Specimens: Mara** Serengeti Research Institute *Belsky*, PJ 204 (SWRC); Seronera *Greenway*, PJ 9863 (K,SWRC); Serengeti National Park *Mboya*, E s.n. (MO);

**CHRYSOCHLOA Swallen**

***Chrysochloa orientalis* (C.E.Hubb) Swallen , Proc. Biol. Soc. Wash. 54: 44 (1941)**

**Distribution:** Tanzania, Kenya, Uganda & Democratic Republic of Congo

**Specimens: Mara** Serengeti Research Institute *Belsky*, PJ 219 (SWRC); Seronera *Greenway*, PJ 9873 (K); Endarbark *Paulo*, S 438 (K); Serengeti Plains *Schmidt*, W 216 (SWRC); Serengeti National Park *Suleiman*, HO 2004 (DSM,SWRC,SWRC); Grumeti Plains *Vesey-FitzGerald*, LDEF 4655 (SWRC);

**CHRYSOPOGON Trin.**

***Chrysopogon aucheri* (Boiss.) Stapf , Bull. Misc. Inform. Kew 1907: 211 (1907)**

**Distribution:** Eastern Africa & Arabia

***Chrysopogon plumulosus* Hochst. , Jahresh. Vereins Vaterl. Naturk. Württemberg 3: 62 (1847)**

(Synonym: *Chrysopogon aucheri* (Boiss.) Stapf var. *quinqueplumis* (A.Rich) Stapf )

**Distribution:** Tropical Africa & Arabia

**Specimens: Arusha** Olkarien *Newbould*, JB 6396 (K); Lemuta *Oteke*, J 251 (K); **Mara** Lake Lagarja *Tanner*, M EAH 12695 (K);

**CTENIUM Panz.**

***Ctenium somalense* (Chiov.) Chiov. , Nuovo Giorn. Bot. Ital., n.s., 26: 82 (1919)**

(Synonym: *Ctenium concinnum* Nees var. *minus* Pilg. )

**Distribution:** Tropical Africa

**Specimens: Mara** Mara River Guard Post *Greenway*, PJ 10767 (K);

**CYMBOPOGON Spreng.**

***Cymbopogon caesius* (Hook. & Arn.) Stapf , Bull. Misc. Inform. Kew 1906: 341 (1906)**

(Synonym: *Cymbopogon excavatus* (Hochst.) Stapf ex Burt Davy )

**Distribution:** Tropical Africa & Asia

**Specimens: Arusha** Engitati Hill *Greenway*, PJ 12607 (K); **Mara** Ikoma *Brooks*, GP 39 (K); Tabora *Greenway*, PJ 10129 (K); Seronera *Greenway*, PJ 10186 (K); **Shinyanga** Lake Magadi *Greenway*, PJ 10046 (K);

***Cymbopogon pospischilii* (K.Schum.) C.E.Hubb , Kew Bull. 4: 175 (1949)**

**Distribution:** Tropical Africa & Asia

**Specimens:** Mara Serengeti National Park *Herlocker, D 2* (K); **Shinyanga** Simiyu river *Greenway, PJ 10380* (K);

***Cymbopogon sp.***

**Specimens:** Mara Serengeti NP *Mollel, N.P. 917* (NHT);

**CYNODON Rich.**

***Cynodon aethiopicus* Clayton & Harlan , Kew Bull. 24: 187 (1970)**

**Distribution:** Eastern & Southern Africa

**Specimens:** Arusha Endulen *Ellemann, L 446* (AAU); Enja Shori *Ellemann, L 708* (AAU);

***Cynodon dactylon* (L.) Pers. , Syn. Pl. 1: 85 (1805)**

**Distribution:** Widespread

**Specimens:** Arusha Olbalbal *Paulo, S 321* (K); Salei Plain *Paulo, S 383* (K); Mara Engare Nanyuki *Newbould, JB 6315* (K);

***Cynodon nlemfuensis* Vanderyst , Bull. Agric. Congo Belge 13: 342 (1922)**

**Distribution:** Tropical Africa, introduced elsewhere

**Specimens:** Arusha Ngorongoro Crater *Raynal, J 19178* (K); Olduvai *Raynal, J 19305* (K);

***Cynodon nlemfuensis* Vanderyst var. *nlemfuensis***

**Distribution:** Tropical Africa, introduced elsewhere

**Specimens:** Arusha Olduvai Gorge *Chuwa, S 2791* (K); Gol Kopjes *Chuwa, S 2867* (K); Ngorongoro Crater *Frame, GW 80* (K); Empakai Crater *Frame, GW 95* (K); Lemuta hill *Paulo, S 350* (K); Mara Seronera *Greenway, PJ 9859* (K); Engare Nanyuki *Paulo, S 360* (K);

***Cynodon nlemfuensis* Vanderyst var. *robustus* Clayton & J.R.Harlan , Kew Bull. 24: 189 (1970)**

**Distribution:** Tropical Africa

**Specimens:** Mara Seronera *Paulo, S 300* (K);

***Cynodon plectostachyus* (K.Schum.) Pilg. , Bot. Jahrb. Syst. 40: 82 (1907)**

**Distribution:** Eastern Africa, introduced elsewhere

**Specimens:** Arusha Olduvai Gorge *Chuwa, S 2790* (K); Engaruka *Leippert 6356* (K); Olbalbal *Paulo, S 410* (K); Mara Seronera *Greenway, PJ 9855* (K); Seronera *Greenway, PJ 10190* (K); Seronera Lodge *Mboya, E s.n.* (MO);

***Cynodon sp.***

**Specimens:** Arusha Endulen *Ellemann, L. 452* (AAU); Lake Madagi *Peterson, P.M. 24318* (US); Shinyanga Naabi Hill Gate *Peterson, P.M. 24259* (US); Naabi Hill Gate *Peterson, P.M. 24268* (US); Naabi Hill Gate *Peterson, P.M. 24270* (US);

**DACTYLOCTENIUM Willd.**

***Dactyloctenium aegyptium* (L.) Willd. , Enum. Pl.: 1029 (1809)**

**Distribution:** Widespread

**Specimens:** Mara Seronera Lodge *Mboya, E s.n.* (MO);

***Dactyloctenium geminatum* Hack. , Bull. Herb. Boissier 7: 26 (1899)**

(Synonym: *Dactyloctenium bogdanii* S.M.Phillips )

**Distribution:** Eastern & Southern Africa

**Specimens:** Arusha Orkuman *Ellemann, L 487* (AAU); Enja Shori *Ellemann, L 707* (AAU); Oldonyo-o-ogol *Ellemann, L 1128* (AAU);

***Dactyloctenium sp.***

**Specimens:** Arusha Ngorongoro Crater *Peterson, P.M. 24306* (US);

**DESCHAMPSIA P.Beauv.**

***Deschampsia flexuosa* (L.) Trin. , Bull. Sci. Acad. Imp. Sci. Saint-Pétersbourg 1: 66 1836**

(Synonym: *Aira caryophyllaea* Leers )

**Distribution:** Widespread

**Specimens:** Arusha Oldeani Mt Newbould, JB 6097 (?);

**DICHANTHIUM Willemet**

***Dichanthium annulatum* (Forssk.) Stapf , Fl. Trop. Afr. 9: 178 (1917)**

**Distribution:** Widespread

**Specimens:** Mara Serengeti National Park Mboya, E s.n. (MO);

***Dichanthium annulatum* (Forssk.) Stapf var. *annulatum***

**Distribution:** Widespread

**Specimens:** Mara Robanda village Mollel, NP 819 B (NHT);

**DISAKISPERMA Steud.**

***Disakisperma yemenicum* (Schweinf.) P.M.Peterson & N.Snow, PhytoKeys 26: 63 (2013)**

(Synonym: *Coelachyrum yemenicum* (Schweinf.) S.M.Phillips, *Cypholepis yemenica* (Schweinf.) Chiov.)

**Distribution:** Arabia, Eastern & Southern Africa

**Specimens:** Arusha Olduvai Gorge Chuwa, S 2608 (K); Olduvai Gorge Chuwa, S 2857 (K); Engaruka Leippert 6362 (K); Oldiang'arangar Newbould, JB 6543 (K); Engaruka Richards, M 25551 (K); Mara Serengeti Banyikwa, FF 2 (NHT); Serengeti Greenway, PJ 10678 (K); Engare Nanyuki springs Greenway, PJ 10694 (K); Shinyanga Naabi Hill Gate Peterson, PM 24254 (US);

**DIGITARIA Haller**

***Digitaria abyssinica* (Hochst. ex A.Rich.) Stapf , Bull. Misc. Inform. Kew 1907: 213 (1907)**

(Synonym: *Digitaria scalarum* (Schweinf.) Chiov. )

**Distribution:** Tropical Africa & Arabia

**Specimens:** Arusha Endulen Ellemann, L 370 (AAU); Empakai Crater Frame, GW 147 (EA,K); Empakai Crater Frame, GW 510 (EA); Empakai Crater Frame, GW 535 (EA); Ngorongoro Crater Gilbert, VC E 27 (EA); Ngorongoro Crater Goddard, J 81 (EA); Ngorongoro Crater Goddard, J 89 (EA); Ngorongoro Crater Goddard, J 97 (EA); Ngorongoro Crater Greenway, PJ 3366 (EA,K); Lake Magadi Peterson, PM 24321 (US); Ngorongoro Crater Pole Evans, IB 972 (K); Ngorongoro Crater West, D 4155 (K); Mara Serengeti National Park Braun, HMM 283 (EA); Serengeti National Park Greenway, PJ 10488 (EA,K); Engare Nanyuki Newbould, JB 6304 (EA,K); Serengeti Plains Paulo, S 372 (EA,K); Simba Kopjes Vesey-FitzGerald, LDEF 6617 (EA);

***Digitaria diagonalis* (Nees) Stapf , Fl. Cap. 7: 381 (1898)**

(Synonym: *Digitaria diagonalis* Stapf var. *uniglumis* (A.Rich) Pilg. )

**Distribution:** Tropical Africa & Arabia

**Specimens:** Arusha Lerong Newbould, JB 5634 (K); Mokilal Newbould, JB 6498 (K); Mara Tabora river Greenway, PJ 10127 (K);

***Digitaria macroblephara* (Hack. ex Schinz) Paoli , Miss. Somal. Ital. Merid., Relaz.: 245 (1916)**

**Distribution:** Tanzania, Kenya, Uganda, Ethiopia, Somalia & Sudan

**Specimens:** Arusha Kakesio River Hornby 2107 (K); Oldiang'arang'ar Ang'ata Newbould, JB 6544 (K); Lemuta hill Paulo, S 351 (K); Olduvai Raynal, J 19304 (K); Mara Nyarawiga Braun, HMM 99 (K); Sand hill Brooks, GP 48 (K); Banagi Hill Brooks, GP 96 (K); Seronera Greenway, PJ 9837 (K); Robanda village Mollel, NP 829 (NHT); Serengeti Paulo, S 339 (K); Soitayai Paulo, S 362 (K); Shinyanga Lake Magadi Leippert, H 5595 (K); Lake Magadi Paulo, S 401 (K); Naabi Hill Gate Peterson, PM 24257 (US);

***Digitaria nodosa* Parl. , Pl. Nov. 39 (1842)**

**Distribution:** Tropical Africa, Asia & Arabia

**Specimens:** Arusha Endoinyo Emboleh Newbould, JB 6521 (K);

***Digitaria rivae* (Chiov.) Stapf , Bull. Misc. Inform. Kew 1907: 213 (1907)**

**Distribution:** Eastern Africa & Arabia

**Specimens:** Mara Lobo Lodge Peterson, PM 24294 (US).

***Digitaria* sp.**

**Specimens:** Arusha Kelogi *Ellemann, L. 482* (AAU); Enja Shori *Ellemann, L. 709* (AAU); Olmekeke *Ellemann, L. 880* (AAU); Olbalbal swamp *Ellemann, L. 1094* (AAU); Oldonyo-o-ogol *Ellemann, L. 1119* (AAU);

***Digitaria ternata* A.Rich.Stapf , Fl. Cap. 7: 376 (1898)**

**Distribution:** Widespread

**Specimens:** Arusha Endulen *Chuwa, S 2637* (NHT); Endulen *Ellemann, L 367* (AAU); Empakaai crater *Frame, GW 87* (NHT);

***Digitaria velutina* (Forssk.) P.Beauv. , Ess. Agrostogr. 51 (1812)**

**Distribution:** Tropical Africa & Arabia

**Specimens:** Arusha Olkarien *Newbould, JB 6409* (K); Mara Banagi *Greenway, PJ 9972* (K); Seronera *Greenway, PJ 10573* (K);

**DIHETEROPOGON Stapf**

***Diheteropogon amplexens* (Nees) Clayton var. *amplexens* , Kew Bull. 20: 75 (1966)**

**Distribution:** Tropical Africa

**Specimens:** Mara Seronera *Greenway, PJ 9900* (K); Banagi *Greenway, PJ 9975* (K); Mara River Guard Post *Greenway, PJ 10770* (K); Tutishi river *Greenway, PJ 10905* (K);

**DINEBRA Jacq.**

***Dinebra caudata* (K.Schum.) P.M. Peterson & N.Snow , Ann. Bot. (Oxford) 109: 1326 (2012)**

(Synonym: *Leptochloa caudata* (K.Schum.) N.Snow )

**Distribution:** Tanzania, Kenya, Uganda, Rwanda and Democratic Republic of Congo

**Specimens:** Arusha Klein's camp *Greenway, PJ 10665* (K); Mara Seronera *Greenway, PJ 10152* (K); Campi ya Mawi *Greenway, PJ 13345* (K);

***Dinebra retroflexa* (Vahl) Panz. , Denkschr. Königl. Akad. Wiss. München 4: 270 (1813)**

**Distribution:** Widespread

**Specimens:** Arusha Laetoli valley *Mollel, NP 1202* (NCAA,NHT);

***Dinebra retroflexa* (Vahl) Panz. var. *condensata* S.M.Philips , Kew Bull. 28(3): 414 (1974)**

**Distribution:** Tropical Africa & Asia

**Specimens:** Mara Nyakoromo Guard Post *Greenway, PJ 10613* (K); Musabi *Greenway, PJ 13168* (?);

**DIPLACHNE P.Beauv.**

***Diplachne fusca* (L.) P.Beauv. ex Roem. & Schult. , Syst. Veg. 2: 615 (1817)**

(Synonym: *Leptochloa fusca* (L.) Kunth ; *Leptochloa fusca* (L.) Kunth subsp. *fusca* )

**Distribution:** Widespread

**Specimens:** Arusha Ngorongoro Crater *Greenway, PJ 12593* (K); Lake Magadi *Peterson, PM 24322* (US); Ngorongoro Crater *Raynal, J 19521* (K); Mara Titushi river flats *Greenway, PJ 10501* (K); Serengeti Plains *Greenway, PJ 13183* (K); Shinyanga Mbalageti river *Greenway, PJ 9027* (K); Lake Magadi *Greenway, PJ 10043* (K); Lake Magadi *Greenway, PJ 12535* (K);

**DISAKISPERMA Steud.**

***Disakisperma obtusiflorum* (Hochst.) P.M. Peterson & N.Snow , Ann. Bot. (Oxford) 109: 1327 (2012)**

(Synonym: *Leptochloa obtusiflora* Hochst. )

**Distribution:** Tropical Africa & Arabia

**Specimens:** Arusha Klein's camp *Greenway, PJ 10666* (K); Mara Banagi *Greenway, PJ 9971* (K);

**ECHINOCHLOA P.Beauv.**

***Echinochloa brevipedicellata* (Peter) Clayton , Kew Bull. 32: 580 (1978)**

**Distribution:** Tanzania & Kenya

**Specimens:** Mara Serengeti National Park *Banyikwa, FF 3 B* (EA);



***Echinochloa colona* (L.) Link , Hort. Berol. 2: 209 (1833)**

**Distribution:** Widespread

**Specimens:** Mara Seronera Lodge *Mboya, E s.n.* (MO); Serengeti National Park *Mboya, E s.n.* (MO); Serengeti Research Centre *Mboya, E s.n.* (MO);

***Echinochloa haploclada* (Stapf) Stapf , Fl. Trop. Afr. 9: 613 (1920)**

**Distribution:** Tropical Africa

**Specimens:** Mara Seronera *Greenway, PJ 9839* (K); Banagi *Leippert 5605* (K); Lobo springs *Vesey-FitzGerald, LDEF 5391* (K);

***Echinochloa ugandensis* Snowden & C.E.Hubb. , Bull. Misc. Inform. Kew 1936: 315 (1936)**

**Distribution:** Eastern & Southern Africa

**Specimens:** Arusha Ngorongoro Crater *Greenway, PJ 12616* (?); Mara Seronera *Greenway, PJ 9860* (?);

**EHRHARTA Thunb.**

***Ehrharta erecta* Lam. , Encycl. 2: 347 (1786)**

(Synonym: *Ehrharta erecta* Lam. var. *abyssinica* (Hochst.) Pilg. )

**Distribution:** Tropical Africa & Arabia

**Specimens:** Arusha Empakai Crater *Frame, GW 186* (K); Nainokanoka *Newbould, JB 6248* (K); Lemigrut *Njau, E EN 803* (NHT);

**ELEUSINE Gaertn.**

***Eleusine jaegeri* Pilg. , Bot. Jahrb. Syst. 43: 93 (1909)**

**Distribution:** East Africa

**Specimens:** Arusha Ngorongoro Crater *Bogdan G41* (K); Ngorongoro Crater *Burttt, BD 4302* (K); Oloronyo *Ellemann, L 664* (AAU); Sendui *Ellemann, L 718* (AAU); Rhino lodge *Ellemann, L 861* (AAU); Armakutian *Ellemann, L 909* (AAU); Empakai Crater *Frame, GW 43* (EA); Empakai Crater *Frame, GW 46* (EA,K); Ngorongoro *Goddard, J 122* (EA); Ngorongoro Crater *Greenway, PJ 3368* (EA,K); Nainokanoka *Greenway, PJ 9149* (K); Ngorongoro Crater *Khayota, B 244* (EA); Oldeani Mt *Moreau 90* (EA,K); Ngorongoro *Moreau, RE 89* (EA); Ngorongoro Crater *Napper, D s.n.* (EA,K); Ngorongoro Crater *Peterson, PM 24299* (US); Ngorongoro Crater *Pole Evans, IB 898* (K); Ngorongoro Crater *Pole Evans, IB 979* (K); Ngorongoro Crater *Pole Evans, IB 981* (K); Ngorongoro Crater *Raynal, J 19056* (K); Lemagarut Mt. *Salt, G 49* (K);

***Eleusine multiflora* Hochst. ex A.Rich. , Tent. Fl. Abyss. 2: 412 (1850)**

**Distribution:** Eastern Africa & Arabia

**Specimens:** Arusha Ngorongoro Crater *Bally, PRO B 2584* (EA); Olduvai Gorge *Chuwa, S 2787* (K); Ngorongoro Crater *Frame, GW 501* (EA); Ngorongoro *Newbould, JB 5652* (EA,K); Mara Seronera *Greenway, PJ 10574* (EA,K); Shinyanga Naabi Hill Gate *Peterson, PM 24272* (US);

**ELIONURUS Humb. & Bonpl. ex Willd.**

***Elionurus muticus* (Spreng.) Kuntze , Revis. Gen. Pl. 3(2): 350 (1898)**

(Synonym: *Elionurus argenteus* Nees )

**Distribution:** Widespread

**Specimens:** Mara Mara River Guard Post *Greenway, PJ 10238* (K); Lobo range *Greenway, PJ 10307* (K); Mara River Guard Post *Greenway, PJ 10769* (K);

**ENNEAPOGON Desv. ex P.Beauv.**

***Enneapogon cenchroides* (Licht.) C.E.Hubb , Bull. Misc. Inform. Kew 1934: 119 (1934)**

**Distribution:** Tropical Africa, Arabia & Asia

**Specimens:** Arusha Mosonik *Newbould, JB 6356* (K); Mara Banagi *Greenway, PJ 10345* (K); Serengeti Research Centre *Mboya, E s.n.* (MO); Salambala *Newbould, JB 6294* (K);

***Enneapogon desvauxii* P.Beauv. , Ess. Agrostogr. 82 (1812)**

(Synonym: *Enneapogon brachystachyus* Stapf )

**Distribution:** Tropical Africa, Asia & Americas

**Specimens:** Arusha Olbalbal *Paulo, S 412* (K); Ngorongoro *Robson, TO 202* (K);

***Enneapogon persicus* Boiss. , Diagn. Pl. Orient. ser. 1, 5: 71 (1844)**

(Synonym: *Enneapogon elegans* (Nees ex Steud.) Stapf )

**Distribution:** Tropical Africa & Asia

**Specimens:** Arusha Gol Kopjes Greenway, PJ 10524 (K); Ngorongoro Crater Greenway, PJ 13605 (K); Mara Seronera Greenway, PJ 10071 (K); Banagi Greenway, PJ 10347 (K); Shinyanga Ipumba Kopje Greenway, PJ 10367 (K);

***Enneapogon* sp.**

**Specimens:** Shinyanga Naabi Hill Gate Peterson, P.M. 24265 (US);

**ENTEROPOGON Nees**

***Enteropogon macrostachyus* (Hochst. ex A.Rich) Munro ex Benth. , J. Linn. Soc., Bot. 19: 101 (1881)**

**Distribution:** Tropical Africa & Arabia

**Specimens:** Mara Seronera Greenway, PJ 9928 (K);

***Enteropogon* sp.**

**Specimens:** Mara Musabi plains Mboya, E. s.n. (MO);

**ERAGROSTIS Wolf**

***Eragrostis aethiopica* Chiov. , Somalia & Benadir: 726 (1899)**

**Distribution:** Tropical Africa & Arabia

**Specimens:** Mara Seronera Greenway, PJ 10542 (K); Shinyanga Moru Kopjes Paulo, S 388 (K);

***Eragrostis aspera* (Jacq.) Nees , Fl. Afr. Austral. III. 408. (1841)**

**Distribution:** Tropical Africa, Arabia & Asia

**Specimens:** Mara Seronera Greenway, PJ 10192 (K); Shinyanga Naabi Hill Greenway, PJ 10359 (K);

***Eragrostis cilianensis* (All.) Janch. , Mitt. Naturwiss. Vereins Univ. Wien 5(9): 110 (1907)**

(Synonym: *Eragrostis polysperma* Peter )

**Distribution:** Widespread

**Specimens:** Arusha Ngorongoro Crater Chuwa, S 2799 (K); Ol Doinyo Lengai Greenway, PJ 11353 (K); Engaruka Leippert, H 6359 (K); Olkarien Newbould, JB 6392 (K); Olbalbal Paulo, S 322 (K); Ngorongoro Crater Peter, A 43114 (W); Mara Seronera Greenway, PJ 9983 (K); Nyarawiga Hill Greenway, PJ 10495 (K); Kirawira Plains Greenway, PJ 13313 (K); Shinyanga Lake Magadi Greenway, PJ 10504 (K);

***Eragrostis exasperata* Peter , Repert. Spec. Nov. Regni Veg. Beih. 40(1 Anh.): 108 (1930)**

**Distribution:** Tropical Africa

**Specimens:** Mara Seronera Greenway, PJ 9952 (K); Tabora Greenway, PJ 10388 (K); Lobo springs Vesey-FitzGerald, LDEF 5392 (K);

***Eragrostis heteromera* Stapf , Fl. Cap. 7: 610 (1900)**

**Distribution:** Tropical Africa

**Specimens:** Mara Simba Kopjes Braun, HMM 228 (K); Ikoma Brooks, GP 37 (K); Seronera Greenway, PJ 9840 (K); Ndabaka Guard Post Greenway, PJ 13330 (K); Serengeti National Park Mboya, E s.n. (MO);

***Eragrostis hispida* K.Schum. , Pflanzenw. Ost-Afrikas, C: 114 (1895)**

**Distribution:** Tropical Africa

**Specimens:** Arusha Klein's camp Greenway, PJ 10939 (K); Mara Seronera Greenway, PJ 9996 (K);

***Eragrostis humidicola* Napper , Kirkia 3: 114 (1963)**

**Distribution:** Kenya, Tanzania, Uganda, Democratic Republic of Congo & Rwanda

**Specimens:** Mara Tabora Greenway, PJ 10134 (K);

***Eragrostis papposa* (Roem. & Schult.) Steud. , Nomencl. Bot. ed. 2, 1: 564(1840)**

(Synonym: *Eragrostis aulacosperma* (Fresen.) Steud. )

**Distribution:** Africa & Asia

**Specimens:** Arusha Ngorongoro Crater Heady, AF 1695 (EA); Ngorongoro Heady, HF 1675 (EA); Olbalbal Newbould, JB 5934 (EA); Olbalbal Newbould, JB 5991 (EA); Olbalbal Newbould, JB 6374 (EA,K); Olduvai Gorge

*Vesey-FitzGerald*, LDEF 4687 (EA); **Mara** Serengeti National Park *Kreulen*, AR 99 (EA); **Shinyanga** Naabi Hill *Braun*, HMM 256 (EA); Naabi Hill *Braun*, HMM 274 (EA);

***Eragrostis pilosa* (L.) P.Beauv. , Ess. Agrostogr. 71 (1812)**

**Distribution:** Widespread

**Specimens:** **Mara** Seronera *Greenway*, PJ 9875 (K); Nyaraswiga Hill *Paulo*, S 395 (K);

***Eragrostis racemosa* (Thunb.) Steud. , Syn. Pl. Glumac. 1(3): 271 (1854)**

**Distribution:** Tropical Africa

**Specimens:** **Arusha** Endulen *Ellemann*, L 776 (AAU); **Mara** Tabora *Greenway*, PJ 10130 (K); Seronera *Greenway*, PJ 10302 (K); **Shinyanga** Handajenga *Greenway*, PJ 13318 (K);

***Eragrostis schweinfurthii* Chiov. , Annuario Reale Ist. Bot. Roma 8: 368 (1908)**

**Distribution:** Tropical Africa & Arabia

**Specimens:** **Arusha** Mokilal *Chuwa*, S 2751 (K); Ngorongoro Crater *Pole Evans*, IB 908 (K);

***Eragrostis* sp.**

**Specimens:** **Arusha** Ngorongoro Crater *Peterson*, P.M. 24302 (US); **Mara** Mbuzi Mare camp *Peterson*, P.M. 24283 (US); Lobo Lodge *Peterson*, P.M. 24290 (US); Lobo Lodge *Peterson*, P.M. 24291 (US); Lobo Lodge *Peterson*, P.M. 24292 (US); **Shinyanga** Naabi Hill Gate *Peterson*, P.M. 24261 (US); Naabi Hill Gate *Peterson*, P.M. 24267 (US); Naabi Hill Gate *Peterson*, P.M. 24271 (US);

***Eragrostis tenuifolia* (A.Rich.) Hochst. ex Steud. , Syn. Pl. Glumac. 1(3): 268 (1854)**

**Distribution:** Tropical Africa

**Specimens:** **Arusha** Mokilal *Chuwa*, S 2751b (K); Sendui *Ellemann*, L 717 (AAU); Empakai Crater *Frame*, GW 90 (K,NHT); Ngorongoro Crater *Pole Evans*, IB 25130 (K); **Mara** Banagi Hill *Brooks*, GP 72 (K); Seronera *Greenway*, PJ 9847 (K);

***Eragrostis viscosa* Trin. , Mém. Acad. Imp. Sci. St.-Pétersbourg, Sér. 6, Sci. Math. 1: 397 (1830)**

**Distribution:** Tropical Africa, Asia & Arabia

**Specimens:** **Arusha** Olduvai Gorge *Verdcourt*, B 4028 (K); **Mara** Engare Nanyuki springs *Greenway*, PJ 10703 (K);

**ERIOCHLOA Kunth**

***Eriochloa fatmensis* (Hochst. & Steud.) Clayton , Kew Bull. 30: 108 (1975)**

(Synonym: *Eriochloa nubica* (Steud.) Hack. & Stapf ex Thell. )

**Distribution:** Tropical Africa & Arabia

**Specimens:** **Arusha** Esere *Chuwa*, S 2585 (K,NHT); Ngorongoro Crater *Chuwa*, SM 2097 K (K); Endulen *Ellemann*, L 371 (AAU); Naibardad Hill *Newbould*, JB 6515 (K); Ngorongoro Crater *Paulo*, S 319 (K); **Mara** Seronera *Greenway*, PJ 9861 (K); Robanda village *Mollel*, NP 839 (NHT); Serengeti NP *Mollel*, NP 899 (NHT); Olndulen *Paulo*, S 414 (K);

***Eriochloa meyeriana* (Nees) Pilg. , Nat. Pflanzenfam. ed. 2, 14e: 56 (1940)**

**Distribution:** Tropical Africa & Arabia

**Specimens:** **Mara** Banagi Hill *Greenway*, PJ 9036 (K); Seronera river *Greenway*, PJ 10179 (K,SWRC); Seronera river *Greenway*, PJ 10600 (SWRC);

***Eriochloa* sp.**

**Specimens:** **Mara** Serengeti NP *Mboya*, E. s.n. (MO);

**EUSTACHYS Desv.**

***Eustachys paspaloides* (Vahl) Lanza & Mattei , Reale Orto Bot. Palermo 9: 56 (1910)**

**Distribution:** Tropical Africa & Arabia

**Specimens:** **Mara** Banagi Hill *Brooks*, GP 65 (K); Ndabaka Plains *Greenway*, PJ 9093 (K); Seronera *Greenway*, PJ 9845 (K); Serengeti Plains *Leippert*, H 5596 (K); Serengeti NP *Mollel*, NP 909 (NHT); Serengeti Plains *Paulo*, S 347 (K); Banagi Hill *Paulo*, S 364 (K); Lobo Lodge *Peterson*, PM 24295 (US); **Shinyanga** Naabi Hill Gate *Peterson*, PM 24264 (US);

**EXOTHECA Andersson**

***Exothea abyssinica* (Hochst. ex A.Rich.) Andersson , Nova Acta Regiae Soc. Sci. Upsal., ser. 3, 2: 253 (1856)**

**Distribution:** Eastern & Southern Africa

**Specimens:** Arusha Oloronyo *Ellemann*, L 771 (AAU); Lemigrut *Njau*, E EN 758 (NHT);

**FESTUCA Tourn. ex L.**

***Festuca obturbans* St.-Yves , Rev. Bretonne Bot. Pure Appl. 2: 83 (1927)**

**Distribution:** Tanzania, Kenya & Yemen

**Specimens:** Arusha Empakai Crater *Greenway*, PJ 9140 (K);

**HARPACHNE Hochst. ex A.Rich.**

***Harpachne schimperi* A.Rich. , Tent. Fl. Abyss. 2: 431 (1850)**

**Distribution:** Eastern Africa & Arabia

**Specimens:** Arusha Lake Magadi *Peterson*, PM 24319 (US); Mara Serengeti Research Centre *Mboya*, E s.n. (MO); Mbuzi Mare camp *Peterson*, PM 24285 (US); Lobo Lodge *Peterson*, PM 24293 (US); Shinyanga Naabi Hill Gate *Peterson*, PM 24266 (US);

**HELICTOTRICHON Besser**

***Helictotrichon elongatum* (Hochst. ex A.Rich.) C.E.Hubb , Bull. Misc. Inform. Kew 1936: 335 (1936)**

**Distribution:** Tropical Africa

**Specimens:** Arusha Empakai Crater *Frame*, GW P 82 (K);

***Helictotrichon lachnanthum* (Hochst. ex A.Rich.) C.E.Hubb. , Bull. Misc. Inform. Kew 1936: 335 (1936)**

**Distribution:** Ghana, Ethiopia, Kenya, Tanzania & Uganda

**Specimens:** Arusha Empakai Crater *Frame*, GW 189 (K); Empakai Crater *Greenway*, PJ 9130 (K); Nainokanoka *Newbould*, JB 5614 (K);

**HETEROPOGON Pers.**

***Heteropogon contortus* (L.) P.Beauv. ex Roem. & Schult. , Syst. Veg. 2: 836 (1817)**

**Distribution:** Widespread

**Specimens:** Arusha Ngorongoro Crater *Metele*, P 3 (NHT); Mara Seronera *Greenway*, PJ 9857 (K); Serengeti Research Centre *Mboya*, E s.n. (MO); Robanda village *Mollel*, NP 847 (NHT);

**HYPARRHENIA Andersson ex E.Fourn.**

***Hyparrhenia anamesa* Clayton , Kew Bull., Addit. Ser. 2: 85 (1969)**

**Distribution:** Tropical Africa

**Specimens:** Arusha Ngorongoro Crater *Greenway*, PJ 12598 (K);

***Hyparrhenia anthistirioides* (Hochst. & A.Rich.) Andersson ex Stapf , Fl. Trop. Afr. 9: 331 (1918)**

**Distribution:** Tropical Africa

**Specimens:** Arusha Laetoli *Mollel*, NP 1165 (NHT); Shinyanga Ndugani Kopjes *Greenway*, PJ 10363 (K); Moru Kopjes *Greenway*, PJ 13177 (K);

***Hyparrhenia cymbaria* (L.) Stapf , Fl. Trop. Afr. 9: 332 (1919).**

**Distribution:** Tropical Africa & Asia

**Specimens:** Arusha Ngorongoro *Tosbrooke*, J 119 (K);

***Hyparrhenia dregeana* (Nees) Stapf ex Stent , Bothalia 1: 249 (1923)**

**Distribution:** Tropical Africa & Arabia

**Specimens:** Arusha Ngorongoro Crater *Heady*, AF 1343 (K);

***Hyparrhenia filipendula* (Hochst.) Stapf , Fl. Trop. Afr. 9: 322 (1918)**

**Distribution:** Tropical Africa & Asia

**Specimens:** Arusha Klein's camp *Greenway*, PJ 10125 (K); Mara Tabora *Greenway*, PJ 10128 (K); Duma river air strip *Greenway*, PJ 10911 (K);

***Hyparrhenia finitima* (Hochst.) Andersson ex Stapf , Fl. Trop. Afr. 9: 299 (1918)**

**Distribution:** Tropical Africa

**Specimens:** Mara Seronera *Greenway*, PJ 10072 (K);

***Hyparrhenia hirta* (L.) Stapf , Fl. Trop. Afr. 9: 315 (1918)**

**Distribution:** Widespread

**Specimens:** Arusha Endulen *Chuwa*, S 2227 (K); Ngorongoro Crater *Chuwa*, S 2745 (K,NHT); Empakaai crater *Frame*, GW 182 (NHT); Klein's camp *Greenway*, PJ 9999 (K); Engitati Hill *Greenway*, PJ 12608 (K,NHT); Ngorongoro Crater *Heady*, AF 1637 (K); Ngorongoro Crater *Metete*, P s.n. (MO);

***Hyparrhenia papillipes* (Hochst. ex A.Rich.) Andersson ex Stapf , Fl. Trop. Afr. 9: 347 (1918)**

**Distribution:** Eastern Africa, Yemen & Madagascar

**Specimens:** Arusha Ngorongoro *Giemeisel*, QL 494 (K); Mara Serengeti *Greenway*, PJ 10690 (K); Engare Nanyuki *Greenway*, PJ 10704 (K); Engare Nanyuki *Newbould*, JB 6185 (K);

***Hyparrhenia pilgeriana* C.E.Hubb , Bull. Misc. Inform. Kew 1928: 39 (1928)**

**Distribution:** Tropical Africa

**Specimens:** Arusha Empakai Crater *Frame*, GW 92 (K,NHT); Empakai Crater *Frame*, GW 140 (K,NHT);

***Hyparrhenia quarrei* Robyns , Fl. Agrost. Congo Belge 1: 171 (1929)**

**Distribution:** Tropical Africa

**Specimens:** Arusha Ngorongoro Crater *Peterson*, PM 24309 (US);

***Hyparrhenia rufa* (Nees) Stapf , Fl. Trop. Afr. 9: 304 (1918)**

**Distribution:** Tropical Africa

**Specimens:** Mara Nyamakachowe *Greenway*, PJ 10507 (K); Musabi *Greenway*, PJ 10619 (K); Shinyanga Beacon Area *Greenway*, PJ 10554 (K); Subiti Hill *Paulo*, S 426 (K);

***Hyparrhenia* sp.**

**Specimens:** Mara Serengeti NP *Mboya*, E. s.n. (MO);

**HYPERTHELIA Clayton**

***Hyperthelia dissoluta* (Nees ex Steud.) Clayton , Kew Bull. 20: 441 (1966)**

**Distribution:** Tropical Africa

**Specimens:** Mara Seronera *Greenway*, PJ 9992 (K); Kirawira Guard Post *Greenway*, PJ 10090 (K); Mbuzi Mare camp *Peterson*, PM 24287 (US);

**ISCHAEMUM L.**

***Ischaemum afrum* (J.F.Gmel.) Dandy , Fl. Pl. Sudan 3: 476 (1956)**

**Distribution:** Tropical Africa & India

**Specimens:** Arusha Ngorongoro Crater *Greenway*, PJ 11846 (K); Ngorongoro CA *Njau*, E EN 729 (NHT);

**LEERSIA Sw.**

***Leersia denudata* Launert , Biol. 46: 144 (1965)**

**Distribution:** Eastern & Southern Africa

**Specimens:** Arusha Ngorongoro Crater *Gilbert*, VC E 25 (EA); Ngorongoro Crater *Greenway*, PJ 12570 (EA);

***Leersia hexandra* Sw. , Prodr. Veg. Ind. Occ. 21 (1788)**

**Distribution:** Widespread

**Specimens:** Arusha Ngorongoro Crater *Newbould*, JB 6523 (K);

***Leersia* sp.**

**Specimens:** Arusha Lake Madagi *Peterson*, P.M. 24323 (US);

**LOUDETIA Hochst. ex Steud.**

***Loudetia arundinacea* (Hochst. ex A.Rich.) Hochst. ex Steud. , Syn. Pl. Glumac. 1: 238 (1854)**

**Distribution:** Tropical Africa

**Specimens:** Mara Kirawira *Greenway*, PJ 10087 (K); Mbuzi Mare camp *Peterson*, PM 24282 (US);

***Loudetia kagerensis* (K.Schum.) C.E.Hubb , Fl. Trop. Afr. 10: 28 (1937)**

**Distribution:** Tropical Africa

**Specimens:** Mara Seronera *Greenway*, PJ 9991 (K); Tabora *Greenway*, PJ 10133 (K); Kampi ya pofu *Greenway*, PJ 13347 (K); Nyamakachowe Hill *Paulo*, S 397 (K);

***Loudetia* sp.**

**Specimens:** Mara Serengeti Research Centre *Mboya*, E. s.n. (MO);

**MELINIS P.Beauv.**

***Melinis repens* (Willd.) Zizka , Biblioth. Bot. 38: 55 (1988)**

**Distribution:** Widespread

**Specimens:** Mara Serengeti Research Centre *Mboya*, E s.n. (MO);

***Melinis* sp.**

**Specimens:** Mara Serengeti NP *Mboya*, E. s.n. (MO);

**MICROCHLOA R.Br.**

***Microchloa kunthii* Desv. , Mém. Soc. Acad. Maine Loire 1: 179 (1831)**

**Distribution:** Widespread

**Specimens:** Arusha Enja Shori *Ellemann*, L 710 (AAU); Olbili-Esere *Ellemann*, L 1016 (AAU); Mara Mbuzi Mare camp *Peterson*, PM 24288 (US); Seronera *Tanner*, M 12969 (EA,SWRC); Shinyanga Naabi Hill Gate *Peterson*, PM 24255 (US);

**ODYSSSEA Stapf.**

***Odyssea paucinervis* (Nees) Stapf , Hooker's Icon. Pl. 31: t. 3100 (1922)**

**Distribution:** Eastern & Southern Africa

**Specimens:** Arusha Lake Magadi *Gilbert*, VC E 40 (K); Lake Magadi *Greenway*, PJ 12576 (K); Lake Magadi *Greenway*, PJ 13597 (K); Lake Magadi *Peterson*, PM 24312 (US);

**OLDEANIA Stapleton**

***Oldeania alpina* (K.Schum.) Stapleton , PhytoKeys 25: 100. (2013)**

(Synonym: *Arundinaria alpina* K.Schum. )

**Distribution:** Tropical Africa

**Specimens:** Arusha Oldeani Mt *Burt*, BD 4223 (K); Oldeani Mt *Chuwa*, S 2679 (K);

**OPLISMENUS P.Beauv.**

***Oplismenus compositus* (L.) P.Beauv. , Ess. Agrostogr. 54 (1812)**

**Distribution:** Widespread

**Specimens:** Mara Bolgonja *Greenway*, PJ 10754 (SWRC);

***Oplismenus hirtellus* (L.) P.Beauv. , Ess. Agrostogr. 54: 170 (1812)**

**Distribution:** Widespread

**Specimens:** Mara Serengeti National Park *Vesey-FitzGerald*, LDEF 4657 (SWRC);

**OROPETIUM Trin.**

***Oropetium capense* Stapf , Fl. Cap. 7: 742(1900)**

**Distribution:** Africa & Arabia

**Specimens:** Mara Seronera *Greenway*, PJ 9854 (SWRC);

**ORYZA L.**

***Oryza eichingeri* Peter , Repert. Spec. Nov. Regni Veg. Beih. 40(1 Anh.): 74 (1930)**

**Distribution:** Tropical Africa & Sri Lanka

**Specimens:** Mara Serengeti National Park *Vesey-FitzGerald*, LDEF 7591 (SWRC);

#### **PANICUM L.**

##### ***Panicum atrosanguineum* Hochst. ex A.Rich. , Tent. Fl. Abyss. 2: 375 (1850)**

**Distribution:** Widespread

**Specimens:** **Arusha** Endulen *Chuwa*, S 2586 (K); Endoinyo Emboleh *Newbould*, JB 6569 (K); **Mara** Lake Lagarja *Belsky*, PJ 79 (SWRC); Lake Lagarja *Greenway*, PJ 10149 (K); Robanda village *Mollel*, NP 858 A (NHT); Serengeti Plains *Schmidt*, W 128 (SWRC); **Shinyanga** Naabi Hill *Brown*, HM 270 (SWRC,WAG); Lake Magadi *Greenway*, PJ 10081 (SWRC); Kitu Hill *Greenway*, PJ 10621 (K,SWRC);

##### ***Panicum calvum* Stapf , Fl. Trop. Afr. 9: 723 (1920)**

**Distribution:** Tropical Africa

**Specimens:** **Arusha** Ngorongoro *Pocs*, T 89038 C (K);

##### ***Panicum chionachne* Mez , Fl. Trop. Afr. 9: 723 (1920)**

**Distribution:** Tropical Africa

**Specimens:** **Arusha** Empakai Crater *Frame*, GW 181 (EA,SWRC); Empakai Crater *Vesey-FitzGerald*, LDEF 7606 (SWRC);

##### ***Panicum coloratum* L. , Mant. Pl. 1: 30 (1767)**

(Synonym: *Panicum coloratum* L. var. *minus* Stapf ex Chiov. )

**Distribution:** Widespread

**Specimens:** **Arusha** Esere *Chuwa*, S 2583 (K); Lemuta *Oteke*, J 208 (K); Kambi ya Nyoka *Pocs*, T 89033 (K); **Mara** Serengeti Research Institute *Belsky*, PJ 212 (SWRC); Lobo Lodge *Belsky*, PJ 237 (SWRC); Serengeti Research Institute *Belsky*, PJ 244 (SWRC); Serengeti National Park *Braun*, MH 365 (SWRC); Seronera *Greenway*, PJ 9862 (SWRC); Seronera *Greenway*, PJ 10187 (K,SWRC); Serengeti Plains *Schmidt*, W 166 (SWRC); **Shinyanga** Lake Magadi *Greenway*, PJ 10505 (K,SWRC); Naabi Hill *Greenway*, PJ 10529 (K,SWRC); Naabi *Paulo*, S 369 (K); Naabi Hill *Schmidt*, W 228 (SWRC);

##### ***Panicum commutatum* Schult. , Mant. 2: 242 (1824)**

(Synonym: *Panicum joorii* Vasey )

**Distribution:** North & South America

**Specimens:** **Shinyanga** Naabi Hill Gate *Peterson*, PM 24263 (US); Naabi Hill Gate *Peterson*, PM 24277 (US); Naabi Hill Gate *Peterson*, PM 24278 (US);

##### ***Panicum deustum* Thunb. , Prodr. Pl. Cap. 19 (1794)**

**Distribution:** Tropical Africa & Afghanistan

**Specimens:** **Arusha** Ngorongoro Crater *Peterson*, PM 24311 (US); **Mara** Bolgonja *Schmidt*, W 418 (SWRC); Bolgonja *Schmidt*, W 522 (SWRC); Bolgonja *Schmidt*, W 523 (SWRC); Seronera *Unknown* s.n. (SWRC);

##### ***Panicum humile* Steud. , Syn. Pl. Glumac. 1: 84 (1854)**

(Synonym: *Panicum watense* Mez )

**Distribution:** Widespread

**Specimens:** **Arusha** Ngorongoro Crater *Peterson*, PM 24304 (US);

##### ***Panicum hygrocharis* Steud. , Syn. Pl. Glumac. 1: 72 (1853)**

**Distribution:** Tropical Africa

**Specimens:** **Arusha** Munge Swamp *Greenway*, PJ 12573 (K); Lerai stream *Newbould*, JB 6252 (K); Ngorongoro *Vesey-FitzGerald*, LDEF 4770 (SWRC); **Mara** Seronera *Greenway*, PJ 10354 (K,SWRC); Seronera river *Greenway*, PJ 10599 (K,SWRC); Serengeti *Kreulen*, AR 321 (SWRC);

##### ***Panicum hymenochilum* Nees , Fl. Afr. Austral. III. 46 (1841)**

**Distribution:** Tropical Africa

**Specimens:** **Arusha** Oldeani Mt *Chuwa*, S 2471 (K);

##### ***Panicum infestum* Andersson , Naturw. Reise Mossambique 2: 546 (1864)**

**Distribution:** Tropical Africa

**Specimens:** **Mara** Kirawira *Vesey-FitzGerald*, LDEF 4658 (SWRC);

***Panicum massaiense* Stapf , Bot. Jahrb. Syst. 34: 144 (1904)**

**Distribution:** Tropical Africa

**Specimens:** **Shinyanga** Mbono river *Greenway*, PJ 10371 (K,SWRC); Beacon Area *Greenway*, PJ 10551 (K,SWRC); Naabi Hill *Paulo*, S 417 (K);

***Panicum maximum* Jacq. , Icon. Pl. Rar. 1: t. 13 (1781)**

(Synonym: *Megathyrsus maximus* (Jacq.) B.K.Simon & S.W.L.Jacobs )

**Distribution:** Widespread

**Specimens:** **Arusha** Nasiporiong *Ellemann*, L 817 (AAU); Naibardad Hill *Newbould*, JB 6434 (K); **Mara** Serengeti Research Institute *Belsky*, PJ 5 (SWRC); Serengeti *Belsky*, PJ 226 (SWRC); Seronera dam *Greenway*, PJ 9981 (K,SWRC); Serengeti Research Centre *Mboya*, E s.n. (MO); Serengeti Research Centre *Mboya*, E s.n. (MO); Bolgonja *Schmidt*, W 371 (SWRC); **Shinyanga** Ngamuriak *Newbould*, JB 6279 (K);

***Panicum monticola* Hook.f. , J. Proc. Linn. Soc., Bot. 7: 226 (1864)**

**Distribution:** Tropical Africa

**Specimens:** **Arusha** Empakai Crater *Frame*, GW 154 (EA,K,NHT,SWRC);

***Panicum poioides* Stapf , Fl. Trop. Afr. 9: 681 (1920)**

(Synonym: *Panicum graciliculme* Napper )

**Distribution:** Tropical Africa

**Specimens:** **Mara** Serengeti *Greenway*, PJ 247 (SWRC); Seronera *Greenway*, PJ 9841 (K,NY,PRE,PRE,SWRC,US); Seronera *Hubert*, MHB 264 (SWRC); Seronera *Hubert*, MHB 269 (SWRC); Serengeti *Kreulen*, AR 323 (SWRC);

***Panicum repens* L. , Sp. Pl. ed. 2, 1: 87 (1762)**

**Distribution:** Widespread

**Specimens:** **Arusha** Oldeani Mt *Chuwa*, S 2678 (K); **Mara** Serengeti National Park *Suleiman*, HO 1094 (SWRC);

***Panicum* sp.**

**Specimens:** **Shinyanga** Moru Kapjes *Braun*, H.M.H. 26 (SWRC);

**PASPALIDIUM Stapf.**

***Paspalidium geminatum* (Forssk.) Stapf , Fl. Trop. Afr. 9: 583 (1920)**

(Synonym: *Setaria geminata* (Forssk.) Veldkamp )

**Distribution:** Widespread

**Specimens:** **Mara** Banagi *Greenway*, PJ 10348 (K,SWRC);

**PASPALUM L.**

***Paspalum scrobiculatum* L. , Mant. Pl. 1: 29 (1767)**

(Synonym: *Paspalum commersonii* Lam. )

**Distribution:** Widespread

**Specimens:** **Mara** Bolgonja river *Greenway*, PJ 10744 (K);

**PENNISETUM Pers.**

***Pennisetum clandestinum* Hochst. ex Chiov. , Annuario Reale Ist. Bot. Roma 8: 41 (1903)**

(Synonym: *Cenchrus clandestinus* (Hochst. ex Chiov.) Morrone )

**Distribution:** Native to Eastern Africa, introduced widely

**Specimens:** **Arusha** Sendui *Ellemann*, L 715 (AAU); Irmisigiyo *Ellemann*, L 774 (AAU); Esongoyo *Ellemann*, L 833 (AAU); Rhino lodge *Ellemann*, L 863 (AAU); Armakutian *Ellemann*, L 910b (AAU); Irmisigiyo *Ellemann*, L 944 (AAU); Empakai Crater *Frame*, GW 103 (K,SWRC);

***Pennisetum mezianum* Leeke , Z. Naturwiss. 79: 39 (1907)**

**Distribution:** Tropical Africa

**Specimens:** **Arusha** Olbalbal *Ellemann*, L 985 (AAU); Olbili-Esere *Ellemann*, L 1017 (AAU); Ngorongoro Crater *Heady*, AF 1505 (K); Ngorongoro Crater *Paulo*, S 318 (K); **Mara** Serengeti Research Institute *Belsky*, PJ 172 (SWRC); Banagi Hill *Brooks*, GP 70 (K); Seronera *Greenway*, PJ 9836 (K,SWRC); Serengeti National Park *Mboya*, E s.n. (MO); Seronera airdrome *Paulo*, S 294 (K); Engare Nanyuki *Paulo*, S 361 (K); Lake Lagarja *Raynal*, J 19340 (K); Simba Kopjes *Schmidt*, W 17 (SWRC); **Shinyanga** Naabi Hill *Kreulen*, AR 229 (SWRC);



***Pennisetum polystachion* (L.) Schult. , Mant. 2: 146 (1824)**

**Distribution:** Widespread

**Specimens:** Arusha Ologumi *Ellemann, L 658* (AAU);

***Pennisetum polystachion* (L.) Schult. subsp atrichum (Stapf & C.E.Hubb) Brunken , Bot. J. Linn. Soc. 79: 63 (1979)**

**Distribution:** Tropical Africa

**Specimens:** Arusha Endulen *Ellemann, L 355* (AAU);

***Pennisetum polystachion* (L.) Schult. subsp polystachion**

**Distribution:** Widespread

**Specimens:** Arusha Sendui *Ellemann, L 721* (AAU); Oltebesi *Ellemann, L 934* (AAU); Irmisigiyo *Ellemann, L 945* (AAU); Oldonyo *Ellemann, L 7763* (AAU);

***Pennisetum riparium* Hochst. ex A.Rich. , Tent. Fl. Abyss. 2: 381 (1850)**

(Synonym: *Cenchrus dowsonii* (Stapf & C.E.Hubb) Morrone ; *Pennisetum dowsonii* Stapf )

**Distribution:** Tanzania, Kenya, Uganda, Ethiopia & Burundi

**Specimens:** Arusha Munge Swamp *Greenway, PJ 12547* (K); Ngorongoro Crater *Heady, AF 1663* (?); Ngorongoro Crater *Heady, HF 1663* (K); Ngorongoro *Pocs, T 89016 A* (K); Ngorongoro *Senga, C 31* (K);

***Pennisetum setaceum* (Forssk.) Chiov. , Boll. Soc. Bot. Ital. 1923: 113 (1923)**

(Synonym: *Cenchrus setaceus* (Forssk.) Morrone )

**Distribution:** Widespread

**Specimens:** Arusha Ngorongoro *Chuwa, S 2599* (K); Kelogi *Ellemann, L 483* (AAU); Lolgarien *Newbould, JB 4* (K); Mara Seronera *Greenway, PJ 10356* (K,SWRC); Simba Kopjes *Greenway, PJ 13152* (K,SWRC);

***Pennisetum* sp.**

**Specimens:** Arusha Kelogi *Ellemann, L. 481* (AAU);

***Pennisetum sphacelatum* (Nees) T.Durand & Schinz , Consp. Fl. Afric. 5: 784 (1894)**

(Synonym: *Cenchrus sphacelatus* (Nees) Morrone ; *Pennisetum schimperi* A.Rich. )

**Distribution:** Tropical Africa

**Specimens:** Arusha Oloronyo *Ellemann, L 665* (AAU); Endulen *Ellemann, L 698* (AAU); Armakutian *Ellemann, L 910 a* (AAU); Empakai Crater *Frame, GW 124* (NHT,SWRC); Ngorongoro Crater *Heady, AF 1670* (K); Ngorongoro *Newbould, JB 5651* (K); Ngorongoro Crater *Peterson, PM 24308* (US); Ngorongoro Crater *Pole Evans, IB 970* (K); Ngorongoro *Welch, JR 601* (K);

***Pennisetum squamulatum* Fresen. , Mus. Senckenberg. 2: 137 (1837)**

(Synonym: *Cenchrus squamulatum* (Fresen.) Morrone )

**Distribution:** Tanzania, Kenya, Ethiopia & Eritrea

**Specimens:** Arusha Olkarien *Newbould, JB 6401* (K); Shinyanga Barafu Kopjes *Greenway, PJ 13173* (K,SWRC);

***Pennisetum stramineum* Peter , Repert. Spec. Nov. Regni Veg. Beih. 40(1 Anh.): 71 (1930)**

(Synonym: *Cenchrus stramineus* (A. Peter) Morrone )

**Distribution:** Eastern Africa & Arabia

**Specimens:** Arusha Empakai Crater *Frame, GW 533* (SWRC); Ngorongoro Crater *Heady, HF 1503* (K); Mara Ndotu Lodge *Belsky, PJ 66* (SWRC); Seronera *Greenway, PJ 10053* (K,SWRC); Seronera *Paulo, S 299* (K); Serengeti *Paulo, S 341* (K); Simba Kopjes *Schmidt, W 43* (SWRC); Shinyanga Naabi Hill *Greenway, PJ 9159* (K); Naabi Hill *Kreulen, AR 230* (SWRC); Naabi Hill Gate *Peterson, PM 24276* (US);

***Pennisetum trachyphyllum* Pilg. , Bot. Jahrb. Syst. 30: 122 (1901)**

(Synonym: *Cenchrus trachyphyllum* (Pilg.) Morrone )

**Distribution:** Eastern & Central Africa

**Specimens:** Arusha Empakai Crater *Frame, GW 238* (SWRC);

**PEROTIS Aiton**

***Perotis patens* Gand. , Bull. Soc. Bot. France 66: 301 (1919 publ. 1920)**

**Distribution:** Tropical Africa

**Specimens:** Mara Seronera *Greenway*, PJ 10198 (SWRC); Bolgonja *Schmidt*, W 495 (SWRC);

**PHALARIS L.**

***Phalaris arundinacea* L. , Sp. Pl. 2: 55 (1753)**

**Distribution:** Widespread

**Specimens:** Arusha Lemala Forest *Chuwa*, S 2725 (K); Empakai Crater *Frame*, GW 187 (K,SWRC); Olmoti crater *Greenway*, PJ 9147 (K); Ngorongoro Crater *Metele*, P s.n. (MO); Ngorongoro *Napper*, D 1682 (K); Rotian glade *Pocs*, T 89016 E (K); Olmoti crater *Raynal*, J 19559 (K); Ngorongoro *Tanner*, M 3270 (K);

**PHRAGMITES Adans.**

***Phragmites australis* (Cav.) Trin. ex Steud. , Nomencl. Bot. ed. 2, 2: 324 (1841)**

**Distribution:** Widespread

**Specimens:** Mara Kirawira *Greenway*, PJ 10377 (K);

**POA L.**

***Poa annua* L. , Sp. Pl. 1: 68 (1753)**

**Distribution:** Widespread

**Specimens:** Arusha Ngorongoro Crater *Greenway*, PJ 12531 (K); Ngorongoro Crater *Peterson*, PM 24301 (US);

***Poa leptoclada* Hochst. ex A.Rich. , Tent. Fl. Abyss. 2: 422 (1850)**

**Distribution:** Tropical Africa & Arabia

**Specimens:** Arusha Empakai Crater *Frame*, GW P 17 (K); Ngorongoro Crater *Greenway*, PJ 3361 (K); Empakai Crater *Greenway*, PJ 9137 (K); Ngorongoro Crater *Greenway*, PJ 12530 (K); Oldeani Mt *Moreau* 96 (K); Ngorongoro FR *Newbould*, JB 5681 (K); Nainokanoka *Newbould*, JB 6244 (K); Ngorongoro Crater *Peterson*, PM 24300 (US);

**POGONARTHRIA Stapf**

***Pogonarthria squarrosa* (Roem. & Schult.) Pilg. , Notizbl. Königl. Bot. Gart. Berlin 5: 149 (1910)**

**Distribution:** Tropical Africa

**Specimens:** Mara Seronera-Klein's camp *Greenway*, PJ 10199 (K);

**POGONONEURA Napper**

***Pogononeura biflora* Napper , Kirkia 3: 112 (1963)**

**Distribution:** Tanzania & Uganda

**Specimens:** Mara Seronera river *Greenway*, PJ 10091 (EA,K,NY,PRE,US); Kirawira *Greenway*, PJ 10608 (K); Musabi-Nyamuma *Greenway*, PJ 10620 (K);

**POLYPOGON Desf.**

***Polypogon monspeliensis* (L.) Desf. , Fl. Atlant. 1: 66 (1798)**

**Distribution:** Widespread

**Specimens:** Arusha Endulen *Chuwa*, S 2897 (K); Klein's camp *Greenway*, PJ 10657 (K); Endulen *Herlocker*, D H 217 (?); Klein's camp *Tanner*, M 1738 (K); Mara Lengusa *Ole Sayalal*, P 5 (K);

***Polypogon schimperianus* (Hochst. ex Steud.) Cope , Kew Bull. 50: 116 (1995)**

**Distribution:** Tropical Africa & Arabia

**Specimens:** Arusha Nainokanoka *Newbould*, JB 6237 (K);

**PSILOLEMMMA S.M.Phillips**

***Psilolemma jaegeri* (Pilg.) S.M.Phillips , Kew Bull. 29: 267 (1974)**

**Distribution:** Tanzania, Kenya, Uganda & Democratic Republic of Congo

**Specimens:** Arusha Lake Magadi *Peterson*, PM 24320 (US); Mara Engare Nanyuki *Newbould*, JB 6314 (K); Shinyanga Mbalageti river *Greenway*, PJ 9028 (K);

**SCHMIDTIA Steud. ex J.A.Schmidt**

***Schmidtia pappophoroides* Steud. ex J.A.Schmidt. , Beitr. Fl. Cap Verd. Ins. 145 (1852)**

(Synonym: *Schmidtia bulbosa* Stapf )

**Distribution:** Tropical Africa & Asia

**Specimens:** Mara Seronera-Klein's camp *Greenway*, PJ 10301 (K);

**SETARIA P.Beauv.**

***Setaria homonyma* (Steud.) Chiov. , Nuovo Giorn. Bot. Ital. n.s., 26: 78 (1919)**

**Distribution:** Tropical Africa & Asia

**Specimens:** Arusha Ngorongoro Crater *Frame*, GW 83 (K,NHT); Enduleni *Njau*, E EN 663 (NHT); Shinyanga Moru Kopjes *Greenway*, PJ 10588 (K);

***Setaria incrassata* (Hochst.) Hack. , Hochgebirgsfl. Afrika 122 (1891)**

**Distribution:** Tropical Africa

**Specimens:** Arusha Endulen *Ellemann*, L 374 (AAU); Mara Serengeti *Paulo*, S 433 (K); Kirawira *Vesey-FitzGerald*, LDEF 4651 (SWRC);

***Setaria kagerensis* Mez , Notizbl. Bot. Gart. Berlin-Dahlem 7: 58 (1917)**

**Distribution:** Tropical Africa

**Specimens:** Arusha Ngorongoro Crater *Newbould*, JB 5973 (K); Mara Seronera *Greenway*, PJ 9946 (K,SWRC);

***Setaria longiseta* P.Beauv. , Fl. Oware 2: 81 (1819)**

**Distribution:** Tropical Africa

**Specimens:** Mara Bolgonja *Schmidt*, W 614 (SWRC); Bolgonja *Schmidt*, W 732a (SWRC);

***Setaria megaphylla* (Steud.) T.Durand & Schinz , Consp. Fl. Afric. 5: 773 (1894)**

**Distribution:** Tropical Africa & Arabia

**Specimens:** Arusha Ngorongoro Crater *Chuwa*, S 2793 (NHT); Ngorongoro *Staples*, RR 284 (K); Mara Bolgonja river *Greenway*, PJ 10757 (K,SWRC); Kogatende *Herlocker*, D 698 (SWRC);

***Setaria orthosticha* K.Schum. ex R.A.W.Herrm. , Beitr. Biol. Pflanzen 10: 49 (1910)**

**Distribution:** Tropical Africa

**Specimens:** Arusha Enduleni *Njau*, E EN 545 (NHT);

***Setaria poiretiana* (Schult.) Kunth , Révis. Gramin. 1: 47 (1829)**

(Synonym: *Setaria caudula* Stapf )

**Distribution:** Widespread

**Specimens:** Arusha Ngorongoro Crater *Chuwa*, S 2794 (K,NHT); Ngorongoro *Moreau* 94 (K);

***Setaria pumila* (Poir.) Roem. & Schult. , Syst. Veg. 2: 891 (1817)**

(Synonym: *Setaria pallide-fusca* (Schumach.) Stapf & C.E.Hubb )

**Distribution:** Widespread

**Specimens:** Arusha Endulen *Ellemann*, L 369 (AAU); Laetoli *Mollel*, NP 1138 (NCAA,NHT); Mara Seronera *Greenway*, PJ 10107 (K,SWRC); Serengeti Plains *Greenway*, PJ 10552 (SWRC); Serengeti Plains *Schmidt*, W 108 (SWRC); Shinyanga Beacon Area *Greenway*, PJ 10545 (K,SWRC);

***Setaria* sp.**

**Specimens:** Arusha Olmoti crater *Vesey-FitzGerald*, L.D.E.F. 17 (SWRC);

***Setaria sphacelata* (Schumach.) Stapf & C.E.Hubb ex Moss , Bull. Misc. Inform. Kew 1929: 195 (1929)**

(Synonym: *Setaria sphacelata* (Schumach.) Stapf & C.E.Hubb ex Moss var. *sericea* (Stapf) Clayton ; *Setaria sphacelata* (Schumach.) Stapf & C.E.Hubb ex Moss var. *torta* (Stapf) Clayton )

**Distribution:** Widespread

**Specimens:** Arusha Empakai Crater *Frame*, GW P 5 (K,NHT); Empakai Crater *Frame*, GW 5 (SWRC); Empakai Crater *Frame*, GW 534 (SWRC); Ngorongoro Crater *Metele*, P 11 (MO,NHT); Enduleni *Njau*, E EN 551 (NHT); Mara Lobo Lodge *Belsky*, PJ 278 (SWRC); Ikoma *Brooks*, GP 36 (K); Seronera river *Greenway*, PJ 9968 (K,SWRC); Serengeti National Park *Mboya*, E s.n. (MO); Serengeti National Park *Mboya*, E s.n. (MO); Serengeti NP *Mboya*,

*EI* 708 (NHT); Robanda village *Mollel*, *NP* 882 (NHT); Seronera river *Schmidt*, *W* 676 (SWRC); Bolgonja *Schmidt*, *W* 805 (SWRC); **Shinyanga** Lake Magadi *Greenway*, *PJ* 10594 (K,SWRC); Ngamuriak *Newbould*, *JB* 6290 (K);

***Setaria sulcata* Raddi , Agrostogr. Bras. 50 (1823)**

**Distribution:** Native to Central & South America, introduced in Tanzania

**Specimens:** Mara Bolgonja *Schmidt*, *W* 521 (SWRC);

***Setaria verticillata* (L.) P.Beauv. , Ess. Agrostogr. 51 (1812)**

**Distribution:** Widespread

**Specimens:** Arusha Endulen *Ellemann*, *L* 694 (AAU); Enja Shori *Ellemann*, *L* 711 (AAU); Nasiporiong *Ellemann*, *L* 818 (AAU); Laetoli *Mollel*, *NP* 1119 (NCAA,NHT); Endulen *Msuya*, *EZM* 16 (K); Kakesio *Newbould*, *JB* 5810 (K);

**Mara** Serengeti Research Institute *Belsky*, *PJ* 136 (SWRC); Seronera *Greenway*, *PJ* 9980 (K,SWRC); Serengeti National Park *Mboya*, *E* s.n. (MO); Serengeti National Park *Mboya*, *E* s.n. (MO);

**SNOWDENIA C.E.Hubb.**

***Snowdenia petitiata* (A.Rich.) C.E.Hubb , Hooker's Icon. Pl. 37: t. 3647 (1967)**

**Distribution:** Eastern Africa & Yemen

**Specimens:** Arusha Empakai Crater *Frame*, *GW* 94 (NHT,SWRC); Empakai Crater *Frame*, *GW* 169 (SWRC);

**SORGHUM Moench.**

***Sorghum arundinaceum* (Desv.) Stapf , Fl. Trop. Afr. 9: 114 (1917)**

(Synonym: *Sorghum verticilliflorum* (Steud.) Stapf )

**Distribution:** Widespread

**Specimens:** Mara Seronera river *Greenway*, *PJ* 10321 (K); Serengeti National Park *Mboya*, *E* s.n. (MO);

***Sorghum versicolor* Andersson , Naturw. Reise Mossambique 2: 563 (1864)**

**Distribution:** Tropical Africa & Arabia

**Specimens:** Shinyanga Ndoha Plains *Greenway*, *PJ* 10075 (K,SWRC); Mbono river *Greenway*, *PJ* 10368 (K,SWRC); Subiti Hill *Paulo*, *S* 425 (K);

**SPOROBOLUS R.Br.**

***Sporobolus africanus* (Poir.) Robyns & Tournay , Bull. Jard. Bot. État 25: 242 (1955)**

(Synonym: *Sporobolus capensis* (P.Beauv.) Kunth )

**Distribution:** Widespread

**Specimens:** Arusha Ngorongoro Crater *Greenway*, *PJ* 3367 (K); Ngoitoktok springs *Greenway*, *PJ* 12597 (K); Ngorongoro Crater *Newbould*, *JB* 5694 (K); Ngorongoro Crater *Pole Evans*, *IB* 974 (K); Mara Togoro Plains *Braun*, *HMH* 210 (K);

***Sporobolus agrostoides* Chiov. , Annuario Reale Ist. Bot. Roma 7: 67 (1897)**

**Distribution:** Tropical Africa

**Specimens:** Mara Mgungu river *Braun*, *HMH* 115 (K);

***Sporobolus confinis* (Steud.) Chiov. , Annuario Reale Ist. Bot. Roma 8: 341 (1908)**

(Synonym: *Sporobolus affinis* A.Rich. ; *Sporobolus phyllotrichus* Hochst. )

**Distribution:** Eastern Africa & Yemen

**Specimens:** Arusha Ngorongoro Crater *Braun*, *HMH* 160 (K); Ngorongoro Crater *Braun*, *HMH* 167 (K); Ngorongoro Crater *Greenway*, *PJ* 11844 (K); Ngorongoro Crater *Heady*, *AF* 1646 (K); Ngorongoro Crater *Peterson*, *PM* 24303 (US);

***Sporobolus consimilis* Fresen. , Mus. Senckenberg. 2: 140 (1837)**

**Distribution:** Tropical Africa & Arabia

**Specimens:** Arusha Ologumi *Ellemann*, *L* 544 (AAU); Olduvai Gorge *Ellemann*, *L* 804 (AAU); Olbili *Ellemann*, *L* 1061 (AAU); Ngorongoro Crater *Newbould*, *JB* 6173 (K); Olduvai *Raynal*, *J* 19301 (K); Mara Seronera river *Greenway*, *PJ* 10352 (K); Shinyanga Moru Kopjes *Greenway*, *PJ* 9154 (K); Lake Magadi *Greenway*, *PJ* 10045 (K);

***Sporobolus cordofanus* (Hochst. ex Steud.) Héring ex Coss. , Bull. Soc. Bot. France 36: 253 (1889)**

(Synonym: *Sporobolus humifusus* (Kunth) Kunth var. *cordofanus* (Hochst. ex Steud.) R.L.Massey )

**Distribution:** Tropical Africa

**Specimens:** Arusha Gol Kopjes Braun, HMH 223 (K); Olkarien Newbould, JB 6405 (K); Lake Magadi Peterson, PM 24313 (US); Mara Seronera Greenway, PJ 9985 (K); Grumechem Greenway, PJ 10329 (K); Seronera river Paulo, S 393 (K);

***Sporobolus coromandelianus* (Retz.) Kunth , Révis. Gramin. 1: 68 (1829)**

**Distribution:** Widespread

**Specimens:** Shinyanga Naabi Hill Gate Peterson, PM 24269 (US);

***Sporobolus discosporus* Nees , Fl. Afr. Austral. III.: 158 (1841)**

**Distribution:** Eastern & Southern Africa

**Specimens:** Arusha Soitayai Paulo, S 363 (EA,K);

***Sporobolus festivus* Hochst. ex A.Rich. , Tent. Fl. Abyss. 2: 398 (1850)**

**Distribution:** Tropical Africa & Asia

**Specimens:** Mara Ikoma Brooks, GP 41 (K); Seronera Greenway, PJ 9842 (K); Seronera Greenway, PJ 9906 (K); Serengeti National Park Mboya, E s.n. (MO); Engare Nanyuki Newbould, JB 6183 (K); Mbuzi Mare camp Peterson, PM 24289 (US); Shinyanga Naabi Hill Gate Peterson, PM 24256 (US);

***Sporobolus fimbriatus* (Nees ex Trin.) Nees , Fl. Afr. Austral. III. 156 (1841)**

(Synonym: *Sporobolus fimbriatus* (Nees ex Trin.) Nees var. *latifolius* Stent )

**Distribution:** Tropical Africa

**Specimens:** Arusha Ngorongoro Crater Chuwa, S 5729 (NHT); Gol Kopjes Greenway, PJ 10735 (K); Mara Seronera Bogdan 1320 (?); Ndabaka Plains Greenway, PJ 9092 (K); Seronera Greenway, PJ 9852 (K); Seronera dam site Greenway, PJ 9982 (K); Seronera Greenway, PJ 10189 (K); Serengeti Greenway, PJ 10487 (K); Robanda village Mollé, NP 846 (NHT); Seronera Newbould, JB 6189 (K); Engare Nanyuki Newbould, JB 6298 (K); East Serengeti Paulo, S 374 (K); Mbuzi Mare camp Peterson, PM 24280 (US); Shinyanga Naabi Hill Greenway, PJ 10737 (K); Lake Magadi Leippert, H 5598 (K); Naabi Paulo, S 370 (K); Naabi Hill Gate Peterson, PM 24258 (US); Naabi Hill Gate Peterson, PM 24260 (US);

***Sporobolus ioclados* (Trin.) Nees , Fl. Afr. Austral. III.: 161 (1841)**

(Synonym: *Sporobolus kentrophyllum* (K.Schum.) Clayton ; *Sporobolus laetevirens* Coss. ; *Sporobolus marginatus* Hochst. ex A.Rich. ; *Sporobolus rangei* Pilg. ; *Sporobolus verdcourtii* Napper )

**Distribution:** Tropical Africa, Arabia & Asia

**Specimens:** Arusha Olbalbal swamp Ellemann, L 1095 (AAU); Oldonyo-o-ogol Ellemann, L 1118 (AAU); Olduvai Headwaters Greenway, PJ 9107 (K); Ol Doinyo Lengai Greenway, PJ 11352 (K); Ang'ata Salei Newbould, JB 6568 (K); Ang'ata Salei Newbould, JB 6572 (K); Ang'ata Salei Oteke, J 236 (K); Olbalbal Paulo, S 327 (K); Ngorongoro Crater Paulo, S 332 (K); Lemuta hill Paulo, S 349 (K); Salei Plain Paulo, S 406 (K); Salei Plain Paulo, S 407 (K); Lake Magadi Phillipson, PB s.n. (MO); Mara Banagi Hill Brooks, GP 64 (K); Banagi Hill Brooks, GP 97 (K); Seronera Greenway, PJ 9843 (K); Seronera Greenway, PJ 9904 (K); Seronera Greenway, PJ 10101 (K); Seronera Greenway, PJ 10185 (K); Seronera Lodge Greenway, PJ 10191 (K); Engare Nanyuki Greenway, PJ 10480 (K); Seronera Greenway, PJ 10652 (K); Musabi plains Mboya, E s.n. (MO); Serengeti National Park Mboya, E s.n. (MO); Serengeti Paulo, S 345 (K); Enderbark Paulo, S 439 (K); Shinyanga Naabi Hill Greenway, PJ 10156 (K); Lake Magadi Greenway, PJ 10506 (K); Lake Magadi Leippert, H 5597 (K); Moru Kopjes Paulo, S 391 (K);

***Sporobolus macranthelus* Chiov. , Fl. Somalia 2: 452. (1932)**

(Synonym: *Sporobolus greenwayi* Napper )

**Distribution:** Tropical Africa

**Specimens:** Arusha Kakesio River Chuwa, S 2631 (K); Kimba Greenway, PJ 12526 (K); Ngorongoro Crater Vesey-FitzGerald, LDEF 2104 (K);

***Sporobolus nervosus* Hochst. , Flora 38: 202 (1855)**

**Distribution:** Eastern & Southern Africa & Arabia

**Specimens:** Arusha Olduvai Gorge Chuwa, S 2636 (K); Olbalbal Paulo, S 402 (K);

***Sporobolus panicoides* A.Rich. , Tent. Fl. Abyss. 2: 399 (1850)**

**Distribution:** Eastern & Southern Africa & Yemen

**Specimens:** Arusha Endulen *Ellemann, L 394* (AAU); Kakesio *Paulo, S 428* (K);

***Sporobolus pellucidus* Hochst. , Flora 38: 201 (1855)**

**Distribution:** Tropical Africa & Arabia

**Specimens:** Arusha Endoinyo Emboleh *Newbould, JB 6375* (K); Mara Togoro Plains *Braun, HMM 211* (K); Seronera *Greenway, PJ 9846* (K); Campi ya Mawi *Greenway, PJ 10943* (K);

***Sporobolus pyramidalis* P.Beauv. , Fl. Oware 2: 36 (1816)**

**Distribution:** Widespread

**Specimens:** Arusha Kakesio plain *Chuwa, S 2626* (K); Mara Seronera *Greenway, PJ 10068* (K); Tabora *Greenway, PJ 10389* (K); Kirawira Plains *Greenway, PJ 13312* (K); Serengeti Research Centre *Mboya, E s.n.* (MO); Lobo Lodge *Peterson, PM 24298* (US);

***Sporobolus rigidifolius* (Trin.) Mez ex Veldkamp , Kew Bull. 45: 582 (1990)**

**Distribution:** Tropical Africa

**Specimens:** Arusha Lake Magadi *Peterson, PM 24317* (US);

***Sporobolus sanguineus* Rendle , Cat. Afr. Pl. 2: 209 (1899)**

(Synonym: *Sporobolus homblei* De Wild. )

**Distribution:** Tropical Africa

**Specimens:** Arusha Lake Magadi *Braun, HMM 165* (K); Hippo pool - Ngorongoro *Greenway, PJ 12594* (K); Ngorongoro Crater *Newbould, JB 6170* (K); Ngorongoro Crater *Vesey-FitzGerald, LDEF 2105* (K); Mara Barelamangi salt lick *Greenway, PJ 10138* (K); Engare Nanyuki *Newbould, JB 6297* (K);

***Sporobolus* sp.**

**Specimens:** Arusha Olduvai Gorge *Ellemann, L. 805* (AAU); Lake Madagi *Phillipson, P.B. s.n.* (MO); Lake Madagi *Phillipson, P.B. s.n.* (MO);

***Sporobolus spicatus* (Vahl) Kunth , Révis. Gramin. 1: 67 (1829)**

**Distribution:** Widespread

**Specimens:** Arusha Oldonyo Lengai Mt. *Clair-Thompson, GN 286* (K); Gol Kopjes *Greenway, PJ 10525* (K); Ol Doinyo Lengai *Greenway, PJ 11350* (K); Ngorongoro Crater *Paulo, S 330* (K); Lake Magadi *Peterson, PM 24315* (US); Olduvai *Raynal, J 19298* (K); Oldonyo Lengai Mt. *Richards, M 25538* (K); Mara Seronera dam site *Greenway, PJ 9984* (K); Seronera *Greenway, PJ 10151* (K); Shinyanga Naabi Hill *Greenway, PJ 10158* (K);

***Sporobolus stapfianus* Gand. , Bull. Soc. Bot. France 66: 302 (1919 publ. 1920)**

**Distribution:** Tropical Africa

**Specimens:** Arusha Ngorongoro *Braun, HMM 214* (K);

**TETRAPOGON Desf.**

***Tetrapogon roxburghiana* (Schult.) P.M.Peterson, Taxon 64(3): 460 (2015)**

(Synonym: *Chloris roxburghiana* Schult.)

**Distribution:** Tropical Africa & Asia

**Specimens:** Mara Serengeti Research Institute *Belsky, PJ 168* (SWRC); Banagi Hill *Brooks, GP 59* (K); Seronera *Greenway, PJ 9851* (K,SWRC); Serengeti Research Centre *Mboya, E s.n.* (MO); Serengeti Research Centre *Mboya, EI 747* (NHT); Seronera *Paulo, S 353* (K); Serengeti Research Institute *Unknown s.n.* (SWRC);

**THEMEDA Forssk.**

***Themeda* sp.**

**Specimens:** Arusha Irmisigiyo *Ellemann, L. 943* (AAU);

***Themeda triandra* Forssk. , Fl. Aegypt.-Arab. 178 (1775)**

**Distribution:** Widespread

**Specimens:** Arusha Empakai Crater *Clair-Thompson, GN 413* (K); Endulen *Ellemann, L 699* (AAU); Sendui *Ellemann, L 722* (AAU); Oloronyo *Ellemann, L 772* (AAU); Olmekeke *Ellemann, L 918* (AAU); Oltebesi *Ellemann,*

L 932 (AAU); Ngorongoro Crater *Metete*, P 10 (MO,NHT); Ngorongoro *Moreau* 95 (K); Ngorongoro Crater *Paulo*, S 316 (K); Ngorongoro Crater *Peterson*, PM 24310 (US); Ngorongoro Crater *Pole Evans*, IB 944 (K); Ngorongoro Crater *Pole Evans*, IB 971 (K); **Mara** Seronera *Greenway*, PJ 9835 (K); Serengeti National Park *Mboya*, E s.n. (MO); Robanda village *Mollel*, NP 819 C (NHT); Seronera airdrome *Paulo*, S 293 (K); Lake Lagarja *Raynal*, J 19343 (K); **Shinyanga** Lake Magadi *Brown*, ES 1045 L (EA); Naabi Hill Gate *Peterson*, PM 24273 (US);

#### **TRACHYPOGON Nees**

***Trachypogon spicatus* (L.f.) Kuntze , Revis. Gen. Pl. 2: 794 (1891)**

**Distribution:** Tropical Africa & Americas

**Specimens:** **Mara** Seronera-Karawera *Greenway*, PJ 10088 (K); Seronera-Klein's camp *Greenway*, PJ 10200 (K);

#### **TRAGUS Haller**

***Tragus berteronianus* Schult. , Mant. 2: 205 (1824)**

**Distribution:** Widespread

**Specimens:** **Arusha** Salei Plain *Paulo*, S 408 (K); **Mara** Seronera *Greenway*, PJ 9864 (K); Serengeti Research Centre *Mboya*, E s.n. (MO); Robanda village *Mollel*, NP 817 (NHT);

***Tragus sp.***

**Specimens:** **Arusha** Lake Madagi *Peterson*, P.M. 24314 (US);

#### **TRICHOLAENA Schrad.**

***Tricholaena teneriffae* (L.f.) Link , Handbuch 1: 91 (1829)**

**Distribution:** Africa, Asia & Europe

**Specimens:** **Arusha** Ngorongoro Crater *Heady*, HF 1631 (K); Lemuta *Newbould*, JB 6179 (K); Oldiang'aranga *Newbould*, JB 6266 (K); **Mara** Serengeti Central Plains *Greenway*, PJ 10697 (K); Seronera river *Greenway*, PJ 10718 (K); Tutiahi river *Greenway*, PJ 10904 (K);

#### **TRICHONEURA Andersson**

***Trichoneura ciliata* (Peter) S.M.Phillips , Kew Bull. 29: 270 (1974)**

**Distribution:** Tanzania, Ethiopia & Kenya

**Specimens:** **Mara** Seronera-Klein's camp *Greenway*, PJ 10196 (EA,K);

#### **TRIPOGON Roem. & Schult.**

***Tripogon minimus* (A.Rich.) Hochst. ex Steud. , Syn. Pl. Glumac. 1: 301 (1854)**

**Distribution:** Tropical Africa

**Specimens:** **Mara** Seronera *Braun*, H 322 (K); Seronera *Braun*, HMM 322 (EA);

#### **UROCHLOA P.Beauv.**

***Urochloa brachyura* (Hack.) Stapf , Fl. Trop. Afr. 9: 592 (1920)**

(Synonym: *Urochloa geniculata* C.E.Hubb )

**Distribution:** Eastern & Southern Africa

**Specimens:** **Mara** Banagi Hill *Braun*, H 198 (K); Togoro Plains *Greenway*, PJ 13344 (K); Seronera Lodge *Mboya*, E s.n. (MO); Serengeti NP *Mollel*, NP 934 (NHT);

***Urochloa panicoides* P.Beauv. , Ess. Agrostogr. 52 (1812)**

**Distribution:** Widespread

**Specimens:** **Arusha** Endulen *Newbould*, JB 5512 (K);
